# Supplementary material for: All in one porous material: exceptional sorption and selective sensing of hexavalent chromium by using a Zr4+ MOF
Source: Royal Society of Chemistry journal article supplement (doi:10.1039/c7ta04496h), 2017-01-01
Supplement: c7ta04496h1.pdf [file c7ta04496h1.pdf]

## ELECTRONIC SUPPORTING INFORMATION

### **All in one porous material: Exceptional sorption and selective sensing of hexavalent chromium by a Zr<sup>4+</sup> MOF**

Sofia Rapti,<sup>a†</sup> Debajit Sarma,<sup>b,c†</sup> Stavros A. Diamantis,<sup>d</sup> Euaggelia Skliri,<sup>e</sup> Gerasimos S. Armatas,<sup>e</sup> Athanassios C. Tsipis,<sup>a</sup> Youssef S. Hassan,<sup>f</sup> Mohamed Alkordi,<sup>f</sup> Christos D. Malliakas,<sup>b</sup> Mercouri G. Kanatzidis,<sup>b</sup> Theodore Lazarides<sup>\*,d</sup> John C. Plakatouras<sup>\*,a</sup> and Manolis J. Manos<sup>\*,a</sup>

*a. Department of Chemistry, University of Ioannina, 45110 Ioannina, Greece.*

*b. Department of Chemistry, Northwestern University, Evanston, IL 60208.*

*c. Department of Chemistry, Indian Institute of Technology, Patna, Bihta - 801103, India*

*d. Department of Chemistry, Aristotle University of Thessaloniki, 54124 Thessaloniki, Greece.*

*e. Department of Materials Science and Technology, University of Crete 71003 Heraklion, Greece.*

*f. Center for Materials Science, 6<sup>th</sup> of October, Zewail City of Science and Technology, Giza, 12588 Egypt*

| <b><i>Contents</i></b>                                                                                                              | <b><i>Page</i></b> |
|-------------------------------------------------------------------------------------------------------------------------------------|--------------------|
| <b>Materials</b>                                                                                                                    | S3                 |
| <b>Syntheses</b>                                                                                                                    | S3                 |
| <b>Analytical and characterization techniques</b>                                                                                   | S4                 |
| <b>Preparation of the column</b>                                                                                                    | S10                |
| <b>Batch ion exchange studies-experimental details</b>                                                                              | S11                |
| <b>Column ion exchange studies-experimental details</b>                                                                             | S12                |
| <b>PXRD patterns after treatment of MOR-2 in alkaline water solutions (Fig. S1)</b>                                                 | S13                |
| <b>Fine suspension of MOR-2 in water (Fig. S2)</b>                                                                                  | S13                |
| <b>TGA (Fig. S3)</b>                                                                                                                | S14                |
| <b>Details for the solution and refinement of the crystal structures (Fig. S4-S15)</b>                                              | S15                |
| <b>FE-SEM images (Fig. S16)</b>                                                                                                     | S32                |
| <b>Gas sorption data for MOR-2 (Fig. S17)</b>                                                                                       | S33                |
| <b>PXRD pattern for MOR-2-HA (Fig. S18)</b>                                                                                         | S34                |
| <b>Gas sorption data for MOR-2-HA (Fig. S19)</b>                                                                                    | S35                |
| <b>Gas sorption data for MOR-2@Cr<sub>2</sub>O<sub>7</sub><sup>2-</sup> and MOR-2@CrO<sub>4</sub><sup>2-</sup> (Fig. S20)</b>       | S36                |
| <b>IR spectra of MOR-2 and MOR@Cr(VI) materials (Fig. S21)</b>                                                                      | S37                |
| <b>XPS spectra (Fig. S22)</b>                                                                                                       | S38                |
| <b>Isotherm Cr<sub>2</sub>O<sub>7</sub><sup>2-</sup>exchange data for MOR-2-HA (Fig. S23)</b>                                       | S39                |
| <b>Kinetics of Cr<sub>2</sub>O<sub>7</sub><sup>2-</sup>ion exchange for MOR-2-HA (Fig. S24)</b>                                     | S40                |
| <b>Total Cr removal (%) by MOR-2 vs. pH (Fig. S25)</b>                                                                              | S40                |
| <b>Selectivity ion exchange data (Fig. S26)</b>                                                                                     | S41                |
| <b>Isotherm CrO<sub>4</sub><sup>2-</sup> exchange data-kinetics of CrO<sub>4</sub><sup>2-</sup> exchange for MOR-2-HA(Fig. S27)</b> | S42                |
| <b>Breakthrough curves (Fig. S28)</b>                                                                                               | S43                |
| <b>Total Cr vs. bed volume for low concentration dichromate solution(Fig. S29)</b>                                                  | S43                |
| <b>Chromate column ion exchange data (Fig. S30)</b>                                                                                 | S44                |
| <b>Breakthrough curves for chrome plating solution (Fig. S31)</b>                                                                   | S45                |
| <b>Fitting of column ion exchange data (Fig. S32, Table S1)</b>                                                                     | S46                |
| <b>Computational Details-Discussion of data (Tables S2, S3, Fig. S33)</b>                                                           | S47                |
| <b>PDF plots (Fig. S34)</b>                                                                                                         | S52                |

|                                                                                                                                                                          |     |
|--------------------------------------------------------------------------------------------------------------------------------------------------------------------------|-----|
| Diffuse reflectance profiles of MOR-2@Cr <sub>2</sub> O <sub>7</sub> <sup>2-</sup> and MOR-2@CrO <sub>4</sub> <sup>2-</sup> and fluorescence profile of MOR-2 (Fig. S35) | S53 |
| Emission spectra of deactivated MOR-2 (Fig. S36)                                                                                                                         | S54 |
| Calibration curve of the fluorescence titration (Fig. S37)                                                                                                               | S55 |
| References                                                                                                                                                               | S56 |
| Table S4. Cartesian coordinates and energetic data                                                                                                                       | S58 |

## EXPERIMENTAL SECTION

**Materials.** ZrCl<sub>4</sub>, 2-aminoterephthalic (NH<sub>2</sub>-H<sub>2</sub>BDC), 2-pyridinecarboxaldehyde and NaBH<sub>4</sub> were purchased from Aldrich. The solvents were used as received.

### SYNTHESES

**2-((pyridin-2-ylmethyl)amino)-terephthalic acid.** 2-pyridinecarboxaldehyde (0.884 g, 8.25 mmol) was added into a stirred suspension of NH<sub>2</sub>-H<sub>2</sub>BDC (1 g, 5.5 mmol) in MeOH (70 mL), in a 100 mL single-neck round-bottomed flask. Within a few minutes a clear yellow solution was formed. To this solution, solid NaBH<sub>4</sub> (2.08g, 55 mmol) was gradually added. The resulting mixture was stirred for 2 h. A colorless solid was precipitated and isolated by filtration, washed with MeOH and dried in the air. The product 2-((pyridin-2-ylmethyl)amino)-terephthalic acid obtained was used for the synthesis of **MOR-2** without further treatment. Yield: 1 g

**<sup>1</sup>H NMR** (500 MHz, DMSO-*d*<sub>6</sub>): δ (ppm) 13.00 (2H, br, COOH), 9.73 (1H, t, J = 6 Hz, -NH-), 8.49 (1H, d, J = 5 Hz, pyH), 7.71 (1H, d, J = 7.5 Hz, pyH), 7.68 (1H, dd, J<sub>1</sub> = 8 Hz, J<sub>2</sub> = 7.5 Hz, PyH), 7.31 (1H, d, J = 8 Hz, ArH), 7.20 (1H, dd, J<sub>1</sub> = 8 Hz, J<sub>2</sub> = 5 Hz, pyH), 6.99 (1H, s, ArH), 6.93 (1H, d, J = 8 Hz, ArH), 4.40 (2H, d, J = 6 Hz, -CH<sub>2</sub>-); **<sup>13</sup>C NMR** (500 MHz, DMSO-*d*<sub>6</sub>): δ (ppm) 172.81, 171.19, 161.00, 149.36, 149.34, 136.96, 131.12, 122.17, 122.07, 121.15, 115.63, 111.42, 49.00.

**MOR-2.** ZrCl<sub>4</sub> (0.625g, 2.7 mmol) and 2-((pyridin-2-ylmethyl)amino)-terephthalic acid (1.017, 0.374 mmol) were dissolved in 75mL DMF and 5mL HCl in a jar. The jar was sealed and placed

in an oven operated at 120 °C, remained undisturbed at this temperature for 20 h and then was allowed to cool at room temperature. Pale yellow powder (no protonated **MOR-2**) was isolated by filtration and dried in the air. This product was treated with 4 M HCl solution to afford the **MOR-2** material. Yield: 1 g. **MOR-2** was analyzed as  $\text{H}_{16}[\text{Zr}_6\text{O}_{16}(\text{H}_2\text{PATP})_4]\text{Cl}_8 \cdot 12\text{H}_2\text{O}$ . Anal. Calc. (%) for  $\text{C}_{56}\text{H}_{88}\text{Cl}_8\text{N}_8\text{O}_{44}\text{Zr}_6$ : C, 27.93; H, 3.68; N, 4.65; Zr, 22.73. Found (%): C, 27.95; H, 3.21; N, 4.64; Zr, 22.64. EDS analysis for **MOR-2** indicated Zr:Cl molar ratio = 1:1.30 (calculated ratio=6:8=1:1.33).

**<sup>1</sup>H NMR** (400 MHz, D<sub>2</sub>O-H<sub>2</sub>SO<sub>4</sub>):  $\delta$  (ppm) 8.25 (1H, d, pyH), 8.14 (1H, m, pyH), 7.65 (2H, d, ArH+pyH), 7.54 (1H, m, pyH), 6.92 (1H, d, ArH), 6.67 (1H, s, ArH), 4.62 (2H, s, -CH<sub>2</sub>-).

**MOR-2-HA composite.** 0.100 g of sodium alginate (SA) was dissolved in 200 mL of water. A fine suspension of **MOR-2**-SA was formed by adding 1 g of **MOR-2** to ~ 20 ml of the SA solution. To this suspension, HCl solution (final concentration ~ 4 M) was then added with continuous stirring. The composite **MOR-2-HA** immediately precipitated and was isolated by filtration. The product was further treated with 4M HCl acid to ensure complete protonation of the functional groups of the material. Yield: 0.885 g. EDS analysis for **MOR-2-HA** indicated Zr:Cl molar ratio =1:1.3. PXRD indicated the similarity between **MOR-2-HA** and **MOR-2** (see below).

### ANALYTICAL AND CHARACTERIZATION TECHNIQUES

**Elemental analyses (C, H, N, Zr).** C,H,N analyses were performed by the in-house facilities of the University of Science and Technology, Center for Materials Science, Zewail City of Science and Technology, Giza, Egypt. Zr was determined gravimetrically as ZrO<sub>2</sub>. Specifically, **MOR-2** sample (100 mg) was heated at ~ 800 °C in air for ~12 h. **MOR-2** was fully converted to ZrO<sub>2</sub> (as confirmed by PXRD). The amount of ZrO<sub>2</sub> produced was then accurately weighted. The

measurement was performed in triplicate and the results were then averaged to determine the % Zr content of **MOR-2**.

**In house X-ray powder diffraction.** Powder X-ray diffraction of the samples were measured at room temperature on a STOE-STADIMP powder diffractometer equipped with an asymmetric curved Germanium monochromator (CuK $\alpha$ 1 radiation,  $\lambda = 1.54056 \text{ \AA}$ ) and one-dimensional silicon strip detector (MYTHEN2 1K from DECTRIS). The line focused Cu X-ray tube was operated at 40 kV and 40 mA. Powder of each sample was packed in a 1 mm diameter polyimide capillary (polymer substrate with neither Bragg reflections nor broad peaks above 10 degrees) and measured in Debye-Scherrer geometry on a spinning stage ( $\sim 200 \text{ rpm}$ ). Intensity data from 3 to 125 degrees two theta were collected over a period of 17 h with a step of 0.005 degrees. Instrument was calibrated against a NIST Silicon standard (640d) prior the measurement.

**PDF experiment.** Powder of sample was packed in a Kapton capillary (1 mm diameter) and diffraction data were collected at room temperature using the rapid acquisition pair distribution function (RA-PDF) technique.<sup>1</sup> Data were collected using a Perkin-Elmer image plate detector and 60 keV energy X-rays ( $\lambda = 0.2114 \text{ \AA}$ ) at the 11-ID-C beam line at APS. Accumulation of 200 frames with an exposure time of 2 s per frame was used to improve counting statistics. The data were integrated using the program FIT2D.<sup>2</sup> Various corrections were made to the data, such as subtraction of background and container, Compton and fluorescence scattering, geometric corrections, absorption, etc.<sup>3</sup> using the program PDFgetX2.<sup>4</sup> Finally, the normalized data were truncated at  $25 \text{ \AA}^{-1}$  before the PDF was calculated. Simulations were carried out using PDFfit2 and PDFgui.<sup>5</sup> Crystallographic models obtained by Rietveld analysis were used as starting models for the refinement of the PDF data. Scaling factor, unit cell parameters, coordinates, and isotropic thermal factors were freely refined in the PDF refinement using the  $I4/m$  space group.

The pair distribution function method (PDF) is a powerful technique for local structure studies. PDF describes the distribution of interatomic distances in a material. The power and the difference of PDF from other crystallographic techniques like Rietveld is that PDF is a total scattering technique which means both the Bragg and diffuse scattering are treated on an equal basis. PDF studies both the long-range atomic structure (Bragg reflections) and the local structure imperfections (diffuse component of the diffraction pattern). The data analysis does not presume any periodicity therefore the PDF technique is very useful for examining amorphous and crystalline samples.

The experiments are straightforward X-ray (or neutron) powder diffraction measurements. From the coherent part,  $I^{coh}(Q)$ , of the measured total diffracted intensity of the material we find the total scattering structure function,  $S(Q)$

$$S(Q) = \frac{I^{coh}(Q) - \sum c_i |f_i(Q)|^2}{\left| \sum c_i f_i(Q) \right|^2} + 1 \quad (1)$$

where the coherent intensity is corrected for background and other experimental effects and normalized by the flux and number of atoms in the sample. Here,  $c_i$  and  $f_i$  are the atomic concentration and X-ray atomic form factor, respectively, for the atomic species of type  $i$ . Momentum transfer,  $Q$ , is given by

$$Q = 4\pi \sin \theta / \lambda \quad (2)$$

By Fourier transforming the expression  $Q[S(Q)-1]$  we have

$$G(r) = (2/\pi) \int_{Q=0}^{Q_{\max}} Q[S(Q)-1] \sin(Q \cdot r) dQ \quad (3)$$

where  $G(r)$  is the atomic pair distribution function which is also defined as

$$G(r) = 4\pi \cdot r [\rho(r) - \rho_0] \quad (4)$$

where  $\rho_0$  is the average atomic number density,  $\rho(r)$  is the atomic pair-density and  $r$  is a radial distance. The function  $G(r)$  gives information about the number of atoms in a spherical shell of unit thickness at a distance  $r$  from a reference atom.

Finally, the experimental  $G(r)$  can be compared and refined against a theoretical  $G(r)$  from a structural model given by

$$G(r) + 4\pi \cdot r \cdot \rho_0 = \frac{1}{r} \sum_{\nu} \sum_{\mu} \frac{f(0)_{\nu} f(0)_{\mu}}{\langle f(0) \rangle^2} \delta(r - r_{\nu\mu}) \quad (5)$$

**IR spectroscopy.** IR spectra were recorded on KBr pellets in the 4000-400  $\text{cm}^{-1}$  range using a Perkin-Elmer Spectrum GX spectrometer.

**Thermal analyses.** Thermogravimetric analyses (TGA) were performed on a NETZSCH STA 449C system. Thermal analysis was conducted from 25 to 600 or 700°C in air atmosphere (100  $\text{mL min}^{-1}$  flow rate) with a heating rate of 10  $^{\circ}\text{C min}^{-1}$ .

**$^1\text{H}$  NMR.**  $^1\text{H}$  NMR spectra were measured with Bruker 250 and 400 MHz spectrometers.

**Energy dispersive spectroscopy (EDS) analyses.** These measurements were performed on a JEOL JSM-6390LV scanning electron microscope (SEM) equipped with an Oxford INCA PentaFET-x3 energy dispersive X-ray spectroscopy (EDS) detector. Data acquisition was performed with an accelerating voltage of 20 kV and 120 s accumulation time.

**FE-SEM.** Scanning electron microscopy (SEM) images were taken with a field emission JEOL JSM 7000F electron microscope operating at 15 kV accelerated voltage. The samples were sputter-coated with a 5-10 nm Au film to reduce charging.

**X-ray photoelectron spectroscopy (XPS).** XPS measurements were performed on a Perkin Elmer Phi 5400 ESCA system equipped with a Mg K $\alpha$  x-ray source. Samples were analyzed at pressures between  $10^{-9}$  and  $10^{-8}$  Torr with a pass energy of 29.35 eV and a take-off angle of 45°. All peaks were referred to the signature C<sub>1s</sub> peak for adventitious carbon at 284.6 eV. Fitting of the peaks has been made by using the “Avantage” software (Thermo Scientific).

**Gas sorption measurements.** N<sub>2</sub> adsorption-desorption isotherms were measured at 77 K on a Quantachrome Nova 3200e sorption analyzer. Before analysis, all samples were EtOH-exchanged, activated via supercritical CO<sub>2</sub> drying and then, degassed at 120 °C under vacuum ( $<10^{-5}$  Torr) for 12 h. The specific surface areas were calculated by applying the Brumauer-Emmett-Teller (BET) method to the branch of isotherms in the 0.05–0.25 relative pressure (P/P<sub>0</sub>) range. CO<sub>2</sub> adsorption isotherms were measured at 273 K using an IGA-003 gravimetric sorption analyzer (Hidden Isochema, UK). The activation of the materials was done as with the N<sub>2</sub> sorption measurements. The pore size distribution plot was obtained from the CO<sub>2</sub> adsorption data using the density functional theory (DFT) method.

**Solid state UV/Vis.** Solid state UV/Vis spectra were obtained on a Shimadzu 1200 PC in the wavelength range of 200–800 nm. BaSO<sub>4</sub> powder was used as a reference (100% reflectance) and base material on which the powder sample was coated. The reflectance data were converted to absorption using the Kubelka-Munk function.<sup>6</sup>

**Fluorescence spectra-sensing experiments.** The fluorescence spectra were measured on a Hitachi F7000 spectrofluorometer. The light source was a Xenon arch lamp and the detector a red sensitive Hamamatsu R928 photomultiplier tube. All spectra are corrected for instrument response using the correction function generated after calibration of the instrument with a standard light source. Appropriate long pass filters were used to remove scattering from the

sample and the monochromators. For the Cr(VI) sensing experiments, 1 mg of the MOF in the form of a fine powder were suspended in 10 ml of the respective medium (doubly distilled water or potable water) the pH of which was previously adjusted to 3 by careful addition of 4M HCl. The system was sonicated for 30 min and 1 mL was removed and placed in a luminescence quartz cuvette. Aliquots of  $\text{K}_2\text{Cr}_2\text{O}_7$   $10^{-4}$  M (dissolved in the same medium as the MOF) were added using a precision Hamilton microsyringe (50  $\mu\text{L}$  range) in order to achieve the desired Cr(VI) concentration. In the cases where real samples were used, stock solutions were prepared by diluting the samples to achieve a concentration of  $10^{-4}$  M (measured by the UV-vis absorption at 350 nm,  $\epsilon = 3300 \text{ M}^{-1}\text{cm}^{-1}$  at  $\text{pH}\sim 3$ ). Emission spectra were recorded 2 min after each addition. The emission spectrum after each addition was recorded three times to ensure signal stability.

**Cr(VI) analyses by UV/Vis.** UV/Vis solution spectra were also obtained on a Shimadzu 1200 PC in the wavelength range of 200-800 nm. Moderate to high concentrations (from 2 to several hundreds of ppm) of Cr(VI) were determined based on the characteristic UV-Vis absorption peaks of dichromate and chromate anions at 350 ( $\epsilon = 3300 \text{ M}^{-1}\text{cm}^{-1}$ ,  $\text{pH}\sim 3$ ) and 370 ( $\epsilon = 4200 \text{ M}^{-1}\text{cm}^{-1}$ ,  $\text{pH}\sim 7$ ) nm respectively.<sup>7</sup> Low Cr(VI) concentrations (0.05-2 ppm) were analyzed with the diphenylcarbazide (DPC) method.<sup>7,8</sup> The method is based on the formation of Cr(III)-diphenylcarbazone resulted from the oxidation of diphenylcarbazide by Cr(VI) in acidic medium ( $\text{pH}\sim 1$ ). The cationic Cr(III) complex has a red-violet color and strongly absorbs in the visible region ( $\lambda_{\text{max}} = 545 \text{ nm}$ ,  $\epsilon = 39600 \text{ M}^{-1}\text{cm}^{-1}$ ). The calibration curve obtained with the DPC method is shown in Figure S0. It can be seen that Cr(VI) can be analysed accurately well below 50 ppb with the DPC method (in fact the quantification limit for Cr(VI) was reported to be as low as 10 ppb<sup>9</sup>). Total Cr can be also determined by oxidizing any  $\text{Cr}^{3+}$  by  $\text{KMnO}_4$ .<sup>7,8</sup>

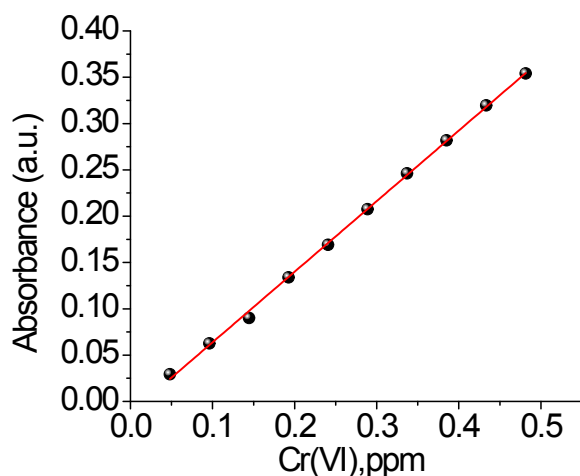

**Figure S0.** The calibration curve obtained with the DPC method ( $R^2=0.998$ ).

**Inductively Coupled Plasma-Mass Spectroscopy (ICP-MS).** The Cr analyses for solutions with extremely low Cr content (<50 ppb) were performed by ICP-MS, specifically using a computer-controlled Thermo Scientific iCAP Q ICP-MS with a quadrupole setup equipped with Collision Cell Technology. Isotope  $^{52}\text{Cr}$  was analyzed. Nine standards of Cr in the range of 1-200 ppb were prepared by diluting commercial (Aldrich chemicals) 1000 ppm solution. All samples (including standards and a blank solution) were prepared in a 3% ultra pure  $\text{HNO}_3$  solution with 2 ppb  $^{89}\text{Y}$  and  $^{115}\text{In}$  internal standards in order to correct for instrumental drift and matrix effects during analysis.<sup>10</sup> The quantification limit for Cr achieved with our ICP-MS analytical procedure was 0.1-0.3 ppb.

### **ION EXCHANGE STUDIES**

**Preparation of the column.** 50 or 100 mg of **MOR-2-HA** composite and 5 g of sand (50-70 mesh  $\text{SiO}_2$ ) was mixed in a mortar and pestle and filled in a glass column (0.7 cm ID column). Prior the ion exchange studies, the column was washed with ~ 7 mL HCl (4 M) solution and deionized water.

**Batch ion-exchange studies.** A typical ion-exchange experiment of **MOR-2** with  $\text{Cr}_2\text{O}_7^{2-}$  is the following: In a solution of  $\text{K}_2\text{Cr}_2\text{O}_7$  (0.4 mmol) in water (10 mL, pH  $\sim$  3), compound **MOR-2** (100 mg,  $\sim$  0.04 mmol of **MOR-2**) was added as a solid. The mixture was kept under magnetic stirring for  $\sim$ 5 min. Then, the polycrystalline material, which had orange-brown color, was isolated by filtration, washed several times with water and acetone and dried in the air. EDS analysis indicated no Cl in the exchanged product and presence of Cr. In order to determine the Zr:Cr ratio with accuracy, ICP-MS analysis has been performed on a sample digested in hot aqua regia. This analysis indicated a Zr:Cr ratio of  $\sim$  0.7 (close to that calculated based on the isotherm sorption data, i.e.  $\text{Zr:Cr} = 6:8 = 0.75$ ). The EDS peaks for pristine vs. dichromate exchanged material are shown in the following graph:

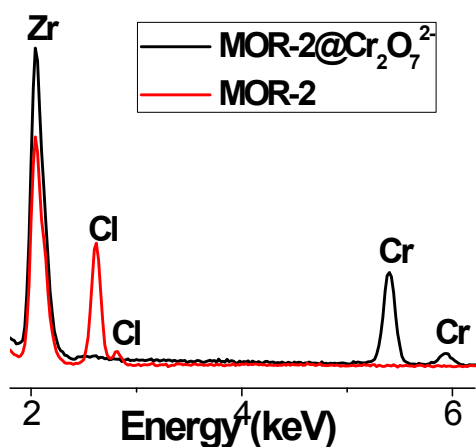

The isolation of the  $\text{CrO}_4^{2-}$  exchanged product was done similarly as that of the  $\text{Cr}_2\text{O}_7^{2-}$  loaded material, with the exception that  $\text{K}_2\text{CrO}_4$  was used instead of  $\text{K}_2\text{Cr}_2\text{O}_7$ . EDS also revealed no Cl for this exchanged material and presence of Cr. The Zr:Cr ratio determined by ICP-MS (on a sample digested in hot aqua regia) was  $\sim$  1 (as expected based on the isotherm sorption data).

The Cr(VI) uptake from solutions of various concentrations was studied by the batch method at  $V:m \sim 1000$  mL/g, room temperature and 1 h contact. These data were used for the determination

of Cr(VI) sorption isotherms. The competitive and variable pH ion exchange experiments were also carried out with the batch method at  $V: m$  ratio  $\sim 1000$  mL/g, room temperature and 1 h contact. The batch ion exchange experiments with the potable and chrome plating solutions were also conducted with  $V: m$  ratio  $\sim 1000$  mL/g, room temperature and 1 h contact. However, in the case of the batch ion exchange experiments with the original chrome plating sample B, the optimum Cr removal efficiency was achieved with  $V: m$  ratio  $\sim 500$  mL/g.

For the determination of the sorption kinetics, Cr(VI) ion-exchange experiments of various reaction times (1-60 min) have been performed. For each experiment, a 10 mL sample of  $\text{Cr}_2\text{O}_7^{2-}$  or  $\text{CrO}_4^{2-}$  solution (initial dichromate concentration = 21.6 ppm, pH $\sim$ 3; initial chromate concentration = 11.6 ppm, pH $\sim$ 7) was added to each vial (containing 10 mg of **MOR-2** or **MOR-2-HA**) and the mixtures were kept under magnetic stirring for the designated reaction times. The suspensions from the various reactions were filtrated and the resulting solutions were analyzed for their chromium content with UV-Vis (DPC method) or ICP-MS.

### **Column Ion-Exchange studies**

Several bed volumes of the solution were passed through the column and collected at the bottom in glass vials. The solutions were analyzed with UV-Vis or ICP-MS. The regeneration of the column was performed by its treatment with  $\sim 7$  mL of HCl acid (4 M) solution. Then, the column is washed with enough water to remove excess acid. Column containing only sand as stationary phase showed no Cr(VI) sorption capacity.

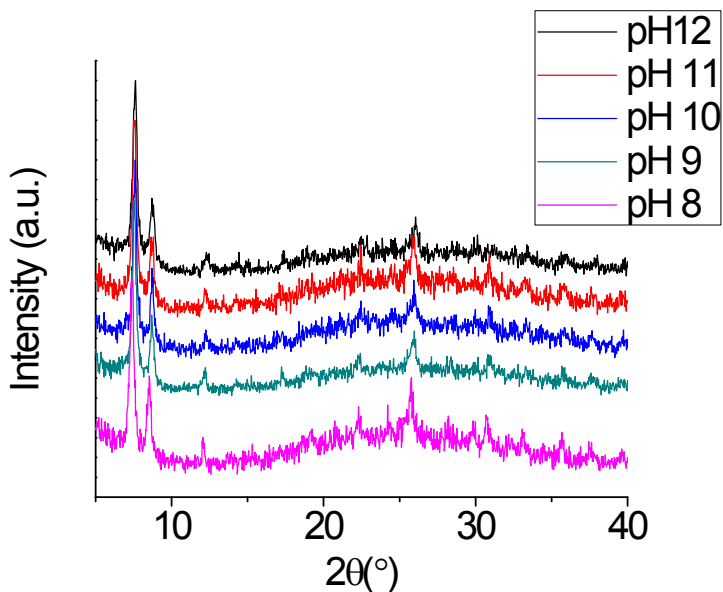

**Figure S1.** PXRD patterns of **MOR-2** after its treatment with alkaline water solutions (pH~8-12).

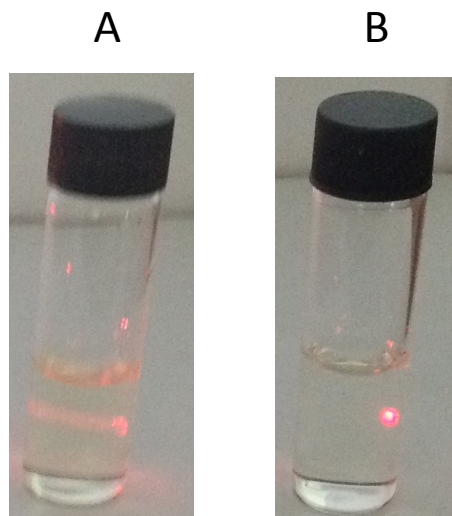

**Figure S2.** A. As **MOR-2**/sand column is washed with deionized water, **MOR-2** flows out of the column. It forms a fine suspension as confirmed by the test with the laser beam (Tyndall effect). B. By washing the **MOR-2-HA**/sand column with deionized water, the effluent collected is a clear solution (as proved by the test with the laser beam).

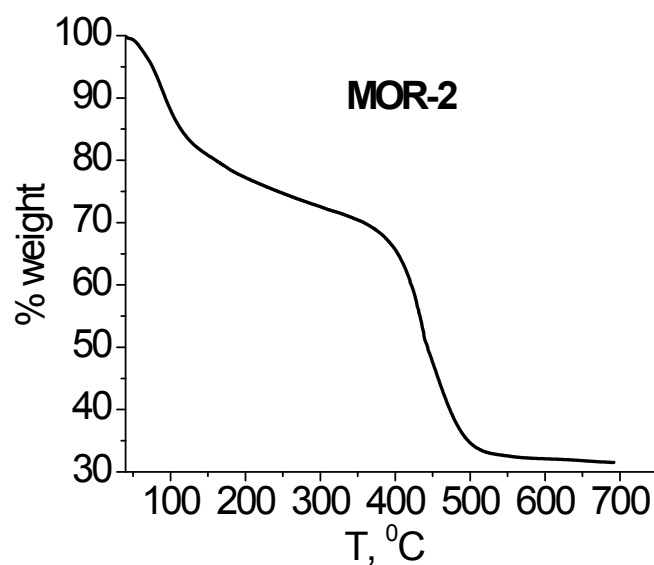

**Figure S3.** The TGA data for **MOR-2** measured in air. The **MOR-2** is finally transformed to  $\text{ZrO}_2$  according to the equation

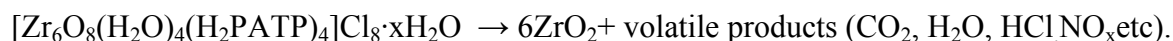

Thus, one mole of  $[\text{Zr}_6\text{O}_4(\text{OH})_8(\text{H}_2\text{O})_4(\text{H}_2\text{PATP})_4]\text{Cl}_8 \cdot x\text{H}_2\text{O}$  yields 6 moles of  $\text{ZrO}_2$  or molecular weight (g) of  $[\text{Zr}_6\text{O}_4(\text{OH})_8(\text{H}_2\text{O})_4(\text{H}_2\text{PATP})_4]\text{Cl}_8 \cdot x\text{H}_2\text{O}$  ( $= 2192.11 + 18x$ ) yields  $6 \times$  molecular weight (g) of  $\text{ZrO}_2$  ( $6 \times 123.2 = 739.2$ ).

From the TGA data, we know that 100 g of **MOR-2** are converted to 31.5 g of  $\text{ZrO}_2$ . Thus, **MOR-2**/ $\text{ZrO}_2$  mass ratio  $= 100/31.5 = 3.175$  or  $2192.11 + 18x/739.2 = 3.175$  and  $x \sim 9$ . This number of lattice water molecules is relatively close to that (12 lattice  $\text{H}_2\text{O}$  molecules) found from the elemental (C, H, N, Zr) analyses data. In addition, the % Zr value calculated from the TGA data (specifically from the mass of the  $\text{ZrO}_2$  residue) is 23.31 %, which is also relatively close to that found from the Zr gravimetric analyses (22.64 %).

### Crystal Structures of MOR-2, MOR-2@Cr<sub>2</sub>O<sub>7</sub><sup>2-</sup>, and MOR-2@CrO<sub>4</sub><sup>2-</sup>

The crystal structures of the pristine material and the Cr(VI) loaded materials were solved by X-ray Powder Diffraction methods, refined with Rietveld methods, and confirmed by PDF (Pair Distribution Function) experiments.

The X-ray powder pattern of **MOR-2** was indexed with TREOR leading to a tetragonal cell, with approximate dimensions 14.7, 14.7, and 20.8 Å (Fig. S4). Bearing in mind that the unit cell can be transformed to a cubic cell, (see for example Fig. S5) and the face centered cubic cell of UiO-66, the best candidate space group must be a body centered one. Eventually *I4/m* was selected as described below.

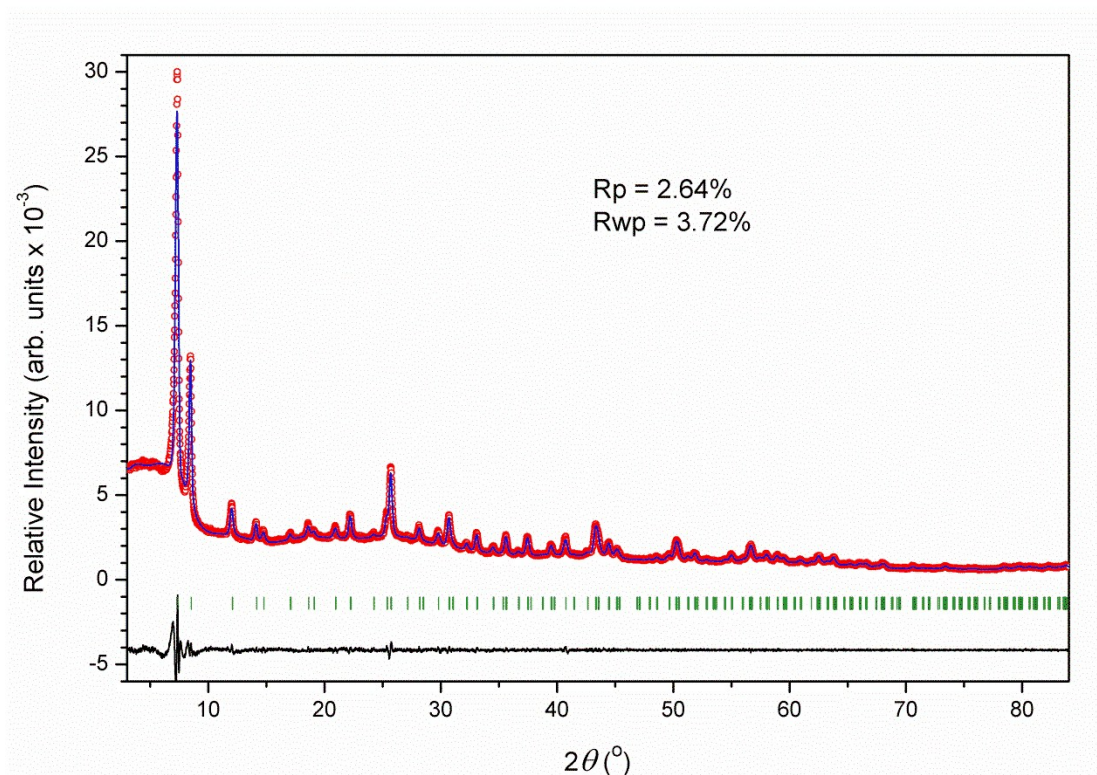

**Figure S4.** Structureless pattern profile refinement plot of **MOR-2** (space group: *I4/m*) ( $\lambda_{\text{CuK}\alpha} = 1.54056$ ). Red: experimental points; blue: calculated points; green: Bragg peaks; black: difference pattern (exp.-calc.).

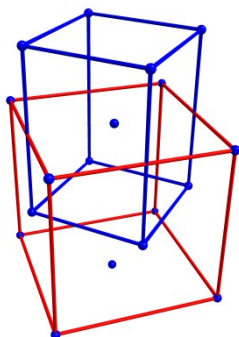

**Figure S5.** Body centered tetragonal (blue) vs. face centered cubic (red) cell in UiO-66. Blue spheres represent the  $\text{Zr}_6\text{O}_8$  core.

Attempts to solve the structure with direct methods (EXPO 2014, reference 27 in main text) resulted in solutions with the  $\text{Zr}_6\text{O}_8$  core on anticipated positions for quite a few space groups (namely  $P4_2$ ,  $\bar{I}4$ ,  $I4/m$ ,  $I4/mmm$ ). There was much electron density all over the cell which could not be assigned to familiar shapes (i.e. hexagons). The best solution from direct methods was introduced to Materials Studio where the ligand was built.

The space group selection problem was dealt with trying to describe as realistic as possible the anticipated positional disordering of substituted 2-pyridinemethylamino group on position 2 of the terephthalate moiety (Fig. S6). Additionally, second harmonic generation (SHG) experiments suggested a centrosymmetric structure, so non centrosymmetric space groups were ignored.

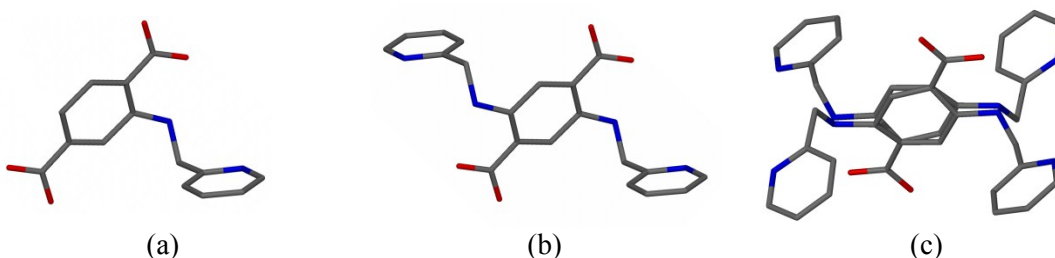

**Figure S6.** Appearance of the ligand in miscellaneous space groups: a)  $\bar{I}4$ , b)  $I4/m$ , c)  $I4/mmm$ .

Inversion centers are located on the centroids of the benzene ring in (b) and (c).

Finally,  $I4/m$  was selected, since the limited disordering would allowed reduced calculation cost and relatively easier study of the produced structure solutions.

Analytical data for **MOR-2** suggested a  $Zr_6O_8$ :ligand ratio of 1/4, or Zr:ligand, 3/2. Our first approach to the solution of the structure was to build a 12-connected network based on UiO-66 and solve and refine the structure considering that has a defected UiO-66 structure, using partial occupancies for the ligand molecules, as done previously (see reference 25j in main text). All of those attempts were met with failure. The next step was to build an 8-connected network, i.e. remove the four linkers about the equatorial plane of the  $Zr_6O_8$  core (Fig. S7).

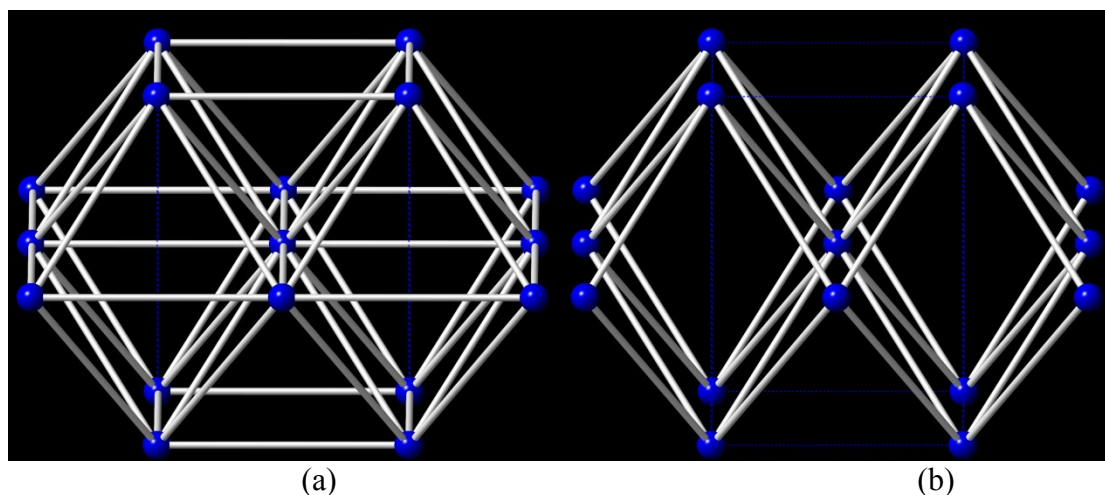

**Figure S7.** Transformation of a 12-connected node (a) to an 8-connected node (b) embedded in a body centered tetragonal lattice.

This way a realistic model of the structure was produced which allowed Rietveld refinement (Fig. S8). The crystallographic data are given in pages S19-S21. In Fig. S9, the interactions of the guest  $Cl^-$  anions and functional group of the  $H_2PATP$  ligand with the  $Zr_6$  core are shown.

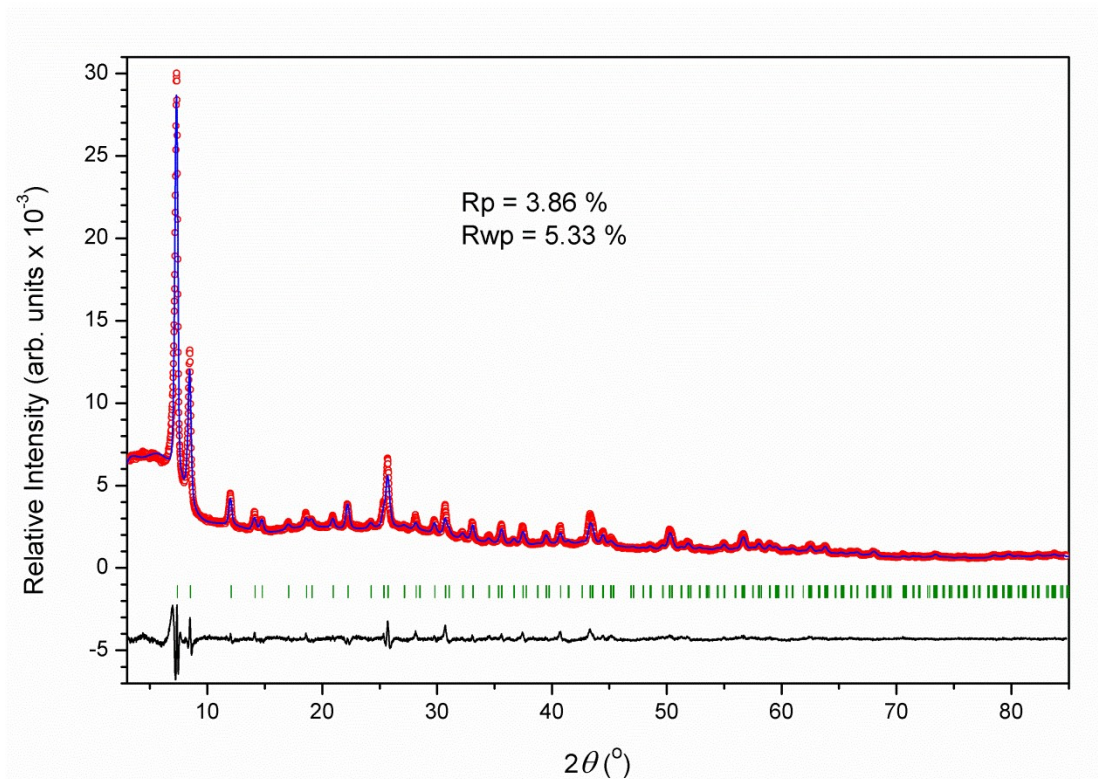

**Figure S8.** Rietveld plot of **MOR-2**. Red: experimental points; blue: calculated points; green: Bragg peaks; black: difference pattern (exp. – calc.).

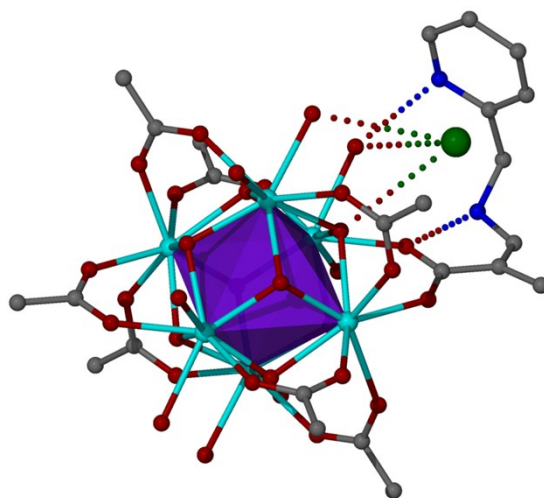

**Figure S9.** The connectivity of the  $\text{Zr}_6\text{O}_8$  core in **MOR-2** showing the interactions of the counter ion and the ligand's substituted group with the core. Color code: Zr, sky blue; O, red; C, grey; N, blue; Cl, green.

data **MOR-2**

```

_audit_creation_date      2017-04-02
_audit_creation_method    'Materials Studio'
_symmetry_space_group_name_H-M  'I4/m'
_symmetry_Int_Tables_number  87
_symmetry_cell_setting    tetragonal
loop_
_symmetry_equiv_pos_as_xyz
  x,y,z
  -x,-y,z
  -y,x,z
  y,-x,z
  -x,-y,-z
  x,y,-z
  y,-x,-z
  -y,x,-z
  x+1/2,y+1/2,z+1/2
  -x+1/2,-y+1/2,z+1/2
  -y+1/2,x+1/2,z+1/2
  y+1/2,-x+1/2,z+1/2
  -x+1/2,-y+1/2,-z+1/2
  x+1/2,y+1/2,-z+1/2
  y+1/2,-x+1/2,-z+1/2
  -y+1/2,x+1/2,-z+1/2
_cell_length_a           14.677(3)
_cell_length_b           14.677(3)
_cell_length_c           20.794(6)
_cell_angle_alpha        90.0000
_cell_angle_beta         90.0000
_cell_angle_gamma        90.0000
loop_
_atom_site_label
_atom_site_type_symbol
_atom_site_fract_x
_atom_site_fract_y
_atom_site_fract_z
_atom_site_U_iso_or_equiv
_atom_site_adp_type
_atom_site_occupancy
O1  O  -0.00114  0.13240  0.06281  0.00500  Uiso  1.00
O2  O   0.16994  0.16994  0.09488  0.08000  Uiso  1.00
O3  O   0.09501  0.09501  0.16972  0.08000  Uiso  1.00
C1  C   0.15328  0.15328  0.15305  0.08000  Uiso  1.00
C2  C   0.20196  0.20196  0.20069  0.08000  Uiso  1.00
C3  C   0.19690  0.17602  0.26487  0.08000  Uiso  1.00
C4  C   0.25521  0.27621  0.18326  0.08000  Uiso  1.00

```

|     |    |          |          |         |         |      |      |
|-----|----|----------|----------|---------|---------|------|------|
| N1  | N  | 0.28248  | 0.29817  | 0.11946 | 0.10000 | Uiso | 0.50 |
| C5  | C  | 0.37977  | 0.32120  | 0.11398 | 0.10000 | Uiso | 0.50 |
| C6  | C  | 0.43659  | 0.23915  | 0.09581 | 0.10000 | Uiso | 0.50 |
| C7  | C  | 0.47678  | 0.19106  | 0.14357 | 0.10000 | Uiso | 0.50 |
| N2  | N  | 0.44833  | 0.20978  | 0.03229 | 0.10000 | Uiso | 0.50 |
| C8  | C  | 0.50100  | 0.13276  | 0.02031 | 0.10000 | Uiso | 0.50 |
| C9  | C  | 0.54222  | 0.08514  | 0.07106 | 0.10000 | Uiso | 0.50 |
| C10 | C  | 0.52814  | 0.11638  | 0.13300 | 0.10000 | Uiso | 0.50 |
| O5  | O  | 0.28266  | 0.12085  | 0.00000 | 0.08000 | Uiso | 0.50 |
| O4  | O  | 0.10203  | 0.27855  | 0.00000 | 0.08000 | Uiso | 0.50 |
| Cl1 | Cl | 0.16711  | 0.54299  | 0.34181 | 0.12000 | Uiso | 1.00 |
| O1w | O  | -0.13491 | -0.08739 | 0.55064 | 0.12000 | Uiso | 1.00 |
| Zr1 | Zr | 0.11954  | 0.11954  | 0.00000 | 0.00500 | Uiso | 1.00 |
| Zr2 | Zr | 0.00000  | 0.00000  | 0.11939 | 0.00500 | Uiso | 1.00 |

loop\_

\_geom\_bond\_atom\_site\_label\_1

\_geom\_bond\_atom\_site\_label\_2

\_geom\_bond\_distance

\_geom\_bond\_site\_symmetry\_2

\_ccdc\_geom\_bond\_type

|     |     |       |   |   |
|-----|-----|-------|---|---|
| O1  | Zr2 | 2.272 | . | S |
| O1  | Zr1 | 2.209 | . | S |
| O1  | Zr1 | 2.182 | 3 | S |
| O2  | C1  | 1.258 | . | S |
| O2  | Zr1 | 2.233 | . | S |
| O3  | C1  | 1.258 | . | S |
| O3  | Zr2 | 2.233 | . | S |
| C1  | C2  | 1.415 | . | S |
| C2  | C3  | 1.390 | . | A |
| C2  | C4  | 1.389 | . | A |
| C4  | N1  | 1.423 | . | S |
| N1  | C5  | 1.472 | . | S |
| C5  | C6  | 1.513 | . | S |
| C6  | C7  | 1.354 | . | A |
| C6  | N2  | 1.400 | . | A |
| C7  | C10 | 1.348 | . | A |
| N2  | C8  | 1.392 | . | A |
| C8  | C9  | 1.403 | . | A |
| C9  | C10 | 1.383 | . | A |
| O5  | Zr1 | 2.394 | . | S |
| O4  | Zr1 | 2.348 | . | S |
| Zr1 | O1  | 2.209 | 6 | S |
| Zr1 | O5  | 2.394 | 6 | S |
| Zr1 | O1  | 2.182 | 4 | S |
| Zr1 | O1  | 2.182 | 7 | S |
| Zr1 | O4  | 2.348 | 6 | S |

|     |    |       |   |   |
|-----|----|-------|---|---|
| Zr1 | O2 | 2.233 | 6 | S |
| Zr2 | O3 | 2.233 | 2 | S |
| Zr2 | O3 | 2.233 | 3 | S |
| Zr2 | O3 | 2.233 | 4 | S |
| Zr2 | O1 | 2.272 | 2 | S |
| Zr2 | O1 | 2.272 | 3 | S |
| Zr2 | O1 | 2.272 | 4 | S |

Though the similarity of the X-ray powder diffraction patterns of **MOR-2@Cr<sub>2</sub>O<sub>7</sub><sup>2-</sup>** and **MOR-2@CrO<sub>4</sub><sup>2-</sup>** with that of **MOR-2** can be considered as strong evidence of their isostructurality with the parent material, the structure solution and refinement procedure was repeated for them as well.

The patterns were indexed successfully to very similar cells, and the space group was left I4/m (Fig. S10 and S13). The first approach to structure solution was to keep the 8-connected network rigid and allow the Cr(IV) species free to move in the cell, in addition to the torsion angles related with the terephthalate substituent. All of the resulting solutions showed the Cr(IV) species in very close proximity to the Zr<sub>6</sub>O<sub>8</sub> core and in some cases chromate and dichromate oxygen atoms were overlapping with the terminal oxygen atoms of the equatorial plane. The next step was to replace the terminal oxygen atom with bridging Cr(IV) species, allowing related bond lengths and angles free to move. In this way reasonable models were obtained which refined successfully (Fig. S11, S14). The crystallographic data for **MOR-2@Cr<sub>2</sub>O<sub>7</sub><sup>2-</sup>** and **MOR-2@CrO<sub>4</sub><sup>2-</sup>** are given in pages S24-S26 and S29-S31 respectively. Fig. S12 and S15 show the packing of the crystal structures of **MOR-2@Cr<sub>2</sub>O<sub>7</sub><sup>2-</sup>** and **MOR-2@CrO<sub>4</sub><sup>2-</sup>** respectively.

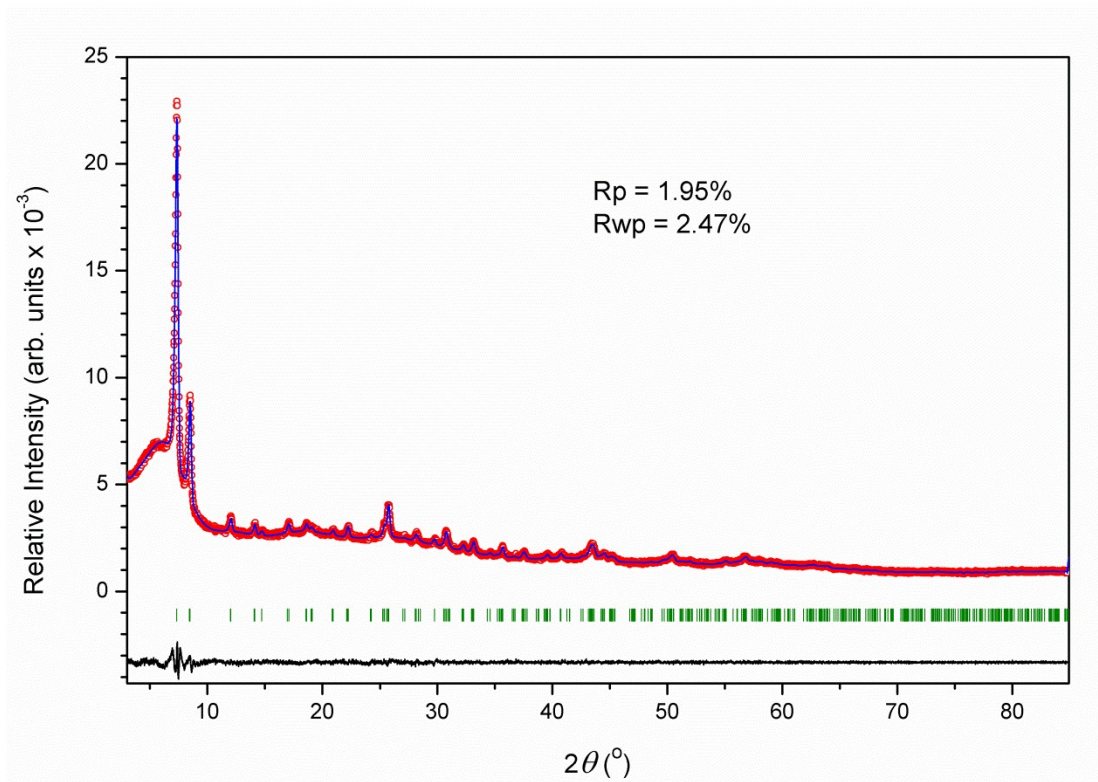

**Figure S10.** Structureless pattern profile refinement plot of **MOR-2@Cr<sub>2</sub>O<sub>7</sub><sup>2-</sup>** (space group: *I4/m*) ( $\lambda_{\text{CuK}\alpha} = 1.54056$ ). Red: experimental points; blue: calculated points; green: Bragg peaks; black: difference pattern (exp.-calc.).

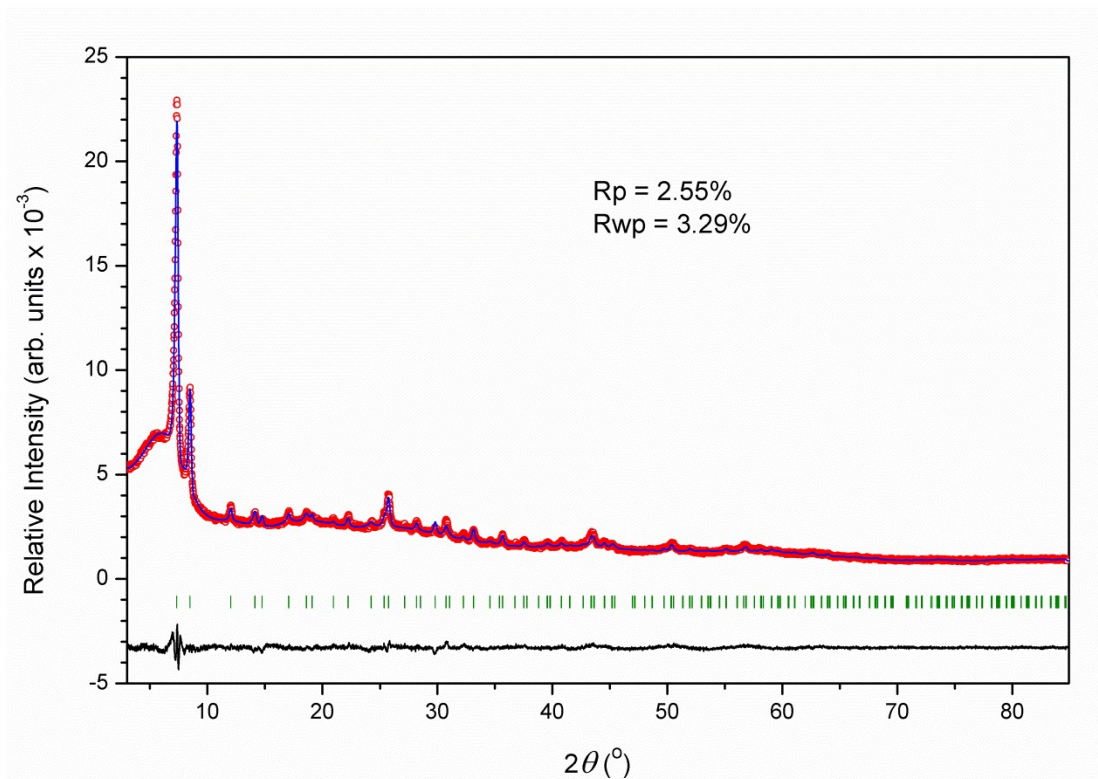

**Figure S11.** Rietveld plot of **MOR-2@Cr<sub>2</sub>O<sub>7</sub><sup>2-</sup>**. Red: experimental points; blue: calculated points; green: Bragg peaks; black: difference pattern (exp. – calc.).

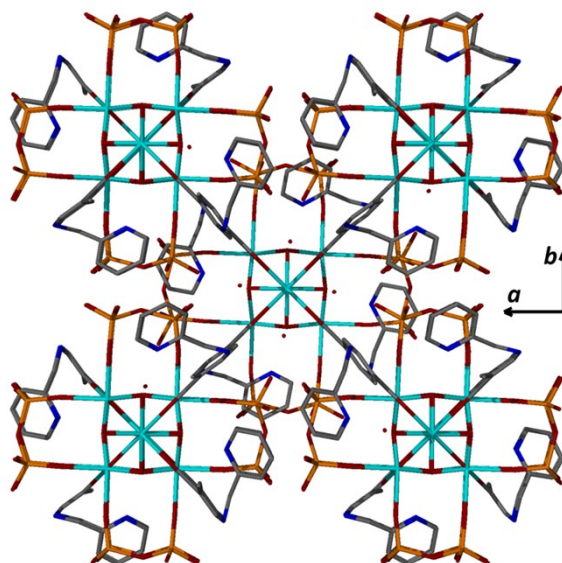

**Figure S12.** A packing diagram of **MOR-2@Cr<sub>2</sub>O<sub>7</sub><sup>2-</sup>** down to *c* axis. Color code: Zr, sky blue; O, red; C, grey; N, blue; Cr, orange.

data **MOR-2@Cr<sub>2</sub>O<sub>7</sub><sup>2-</sup>**

\_audit\_creation\_date 2017-04-03

\_audit\_creation\_method 'Materials Studio'

\_symmetry\_space\_group\_name\_H-M 'I4/M'

\_symmetry\_Int\_Tables\_number 87

\_symmetry\_cell\_setting tetragonal

loop\_

\_symmetry\_equiv\_pos\_as\_xyz

x,y,z

-x,-y,z

-y,x,z

y,-x,z

-x,-y,-z

x,y,-z

y,-x,-z

-y,x,-z

x+1/2,y+1/2,z+1/2

-x+1/2,-y+1/2,z+1/2

-y+1/2,x+1/2,z+1/2

y+1/2,-x+1/2,z+1/2

-x+1/2,-y+1/2,-z+1/2

x+1/2,y+1/2,-z+1/2

y+1/2,-x+1/2,-z+1/2

-y+1/2,x+1/2,-z+1/2

\_cell\_length\_a 14.660(2)

\_cell\_length\_b 14.660(2)

\_cell\_length\_c 20.709(3)

\_cell\_angle\_alpha 90.0000

\_cell\_angle\_beta 90.0000

\_cell\_angle\_gamma 90.0000

loop\_

\_atom\_site\_label

\_atom\_site\_type\_symbol

\_atom\_site\_fract\_x

\_atom\_site\_fract\_y

\_atom\_site\_fract\_z

\_atom\_site\_U\_iso\_or\_equiv

\_atom\_site\_adp\_type

\_atom\_site\_occupancy

O1 O -0.00114 0.13240 0.06281 0.05000 Uiso 1.00

O2 O 0.16994 0.16994 0.09488 0.08000 Uiso 1.00

O3 O 0.09501 0.09501 0.16972 0.08000 Uiso 1.00

C1 C 0.15328 0.15328 0.15305 0.08000 Uiso 1.00

C2 C 0.20196 0.20196 0.20069 0.08000 Uiso 1.00

C3 C 0.19690 0.17602 0.26487 0.08000 Uiso 1.00

C4 C 0.25521 0.27621 0.18326 0.08000 Uiso 1.00

|     |    |         |          |          |         |      |      |
|-----|----|---------|----------|----------|---------|------|------|
| N1  | N  | 0.28248 | 0.29817  | 0.11946  | 0.10000 | Uiso | 0.50 |
| C5  | C  | 0.30208 | 0.21760  | 0.07969  | 0.10000 | Uiso | 0.50 |
| C6  | C  | 0.33559 | 0.13834  | 0.11968  | 0.10000 | Uiso | 0.50 |
| C7  | C  | 0.41196 | 0.15049  | 0.15504  | 0.10000 | Uiso | 0.50 |
| N2  | N  | 0.29071 | 0.05380  | 0.12270  | 0.10000 | Uiso | 0.50 |
| C10 | C  | 0.32611 | -0.01479 | 0.16151  | 0.10000 | Uiso | 0.50 |
| C9  | C  | 0.40589 | 0.00015  | 0.19703  | 0.10000 | Uiso | 0.50 |
| C8  | C  | 0.44741 | 0.08493  | 0.19284  | 0.10000 | Uiso | 0.50 |
| O1W | O  | 0.51101 | 0.33714  | 0.21281  | 0.12000 | Uiso | 0.98 |
| O19 | O  | 0.43359 | 0.15207  | 0.06672  | 0.10000 | Uiso | 0.50 |
| O17 | O  | 0.28484 | 0.12515  | 0.00304  | 0.10000 | Uiso | 0.50 |
| O18 | O  | 0.44180 | 0.16879  | 0.05970  | 0.10000 | Uiso | 0.50 |
| O20 | O  | 0.42594 | -0.00511 | 0.01189  | 0.10000 | Uiso | 0.50 |
| O21 | O  | 0.43494 | -0.08629 | -0.10864 | 0.10000 | Uiso | 0.50 |
| O22 | O  | 0.44328 | -0.19078 | -0.00431 | 0.10000 | Uiso | 0.50 |
| O23 | O  | 0.28634 | -0.11246 | -0.03925 | 0.10000 | Uiso | 0.50 |
| Cr2 | Cr | 0.39568 | -0.10238 | -0.03737 | 0.10000 | Uiso | 0.50 |
| Zr1 | Zr | 0.11954 | 0.11954  | 0.00000  | 0.05000 | Uiso | 1.00 |
| Cr1 | Cr | 0.39442 | 0.11470  | 0.00000  | 0.10000 | Uiso | 1.00 |
| Zr2 | Zr | 0.00000 | 0.00000  | 0.11939  | 0.05000 | Uiso | 1.00 |

loop\_

\_geom\_bond\_atom\_site\_label\_1

\_geom\_bond\_atom\_site\_label\_2

\_geom\_bond\_distance

\_geom\_bond\_site\_symmetry\_2

\_ccdc\_geom\_bond\_type

|     |     |       |    |   |
|-----|-----|-------|----|---|
| O1  | Zr1 | 2.204 | .  | S |
| O1  | Zr2 | 2.267 | .  | S |
| O1  | Zr1 | 2.177 | 3  | S |
| O2  | C1  | 1.253 | .  | S |
| O2  | Zr1 | 2.225 | .  | S |
| O3  | C1  | 1.256 | .  | S |
| O3  | Zr2 | 2.229 | .  | S |
| C1  | C2  | 1.411 | .  | S |
| C2  | C3  | 1.384 | .  | S |
| C2  | C4  | 1.387 | .  | S |
| C3  | C4  | 1.462 | 13 | S |
| C4  | N1  | 1.417 | .  | S |
| C4  | C3  | 1.462 | 13 | S |
| N1  | C5  | 1.468 | .  | S |
| C5  | C6  | 1.509 | .  | S |
| C6  | C7  | 1.350 | .  | S |
| C6  | N2  | 1.405 | .  | S |
| C7  | C8  | 1.344 | .  | S |
| N2  | C10 | 1.388 | .  | S |
| C10 | C9  | 1.399 | .  | S |

|     |     |       |   |   |
|-----|-----|-------|---|---|
| C9  | C8  | 1.387 | . | S |
| O19 | Cr1 | 1.593 | . | S |
| O17 | Zr1 | 2.426 | . | S |
| O17 | Cr1 | 1.615 | . | S |
| O18 | Cr1 | 1.625 | . | S |
| O20 | Cr2 | 1.809 | . | S |
| O20 | Cr1 | 1.833 | . | S |
| O20 | Cr2 | 1.584 | 6 | S |
| O21 | Cr2 | 1.602 | . | S |
| O22 | Cr2 | 1.623 | . | S |
| O22 | Cr2 | 1.706 | 6 | S |
| O23 | Cr2 | 1.610 | . | S |
| O23 | O23 | 1.626 | 6 | S |
| O23 | Cr2 | 2.260 | 6 | S |
| Cr2 | O20 | 1.584 | 6 | S |
| Cr2 | O22 | 1.706 | 6 | S |
| Cr2 | O23 | 2.260 | 6 | S |
| Cr2 | Cr2 | 1.548 | 6 | S |
| Zr1 | O2  | 2.225 | 6 | S |
| Zr1 | O1  | 2.204 | 6 | S |
| Zr1 | O17 | 2.426 | 6 | S |
| Zr1 | O1  | 2.177 | 4 | S |
| Zr1 | O1  | 2.177 | 7 | S |
| Cr1 | O19 | 1.593 | 6 | S |
| Cr1 | O17 | 1.615 | 6 | S |
| Cr1 | O18 | 1.625 | 6 | S |
| Cr1 | O20 | 1.833 | 6 | S |
| Zr2 | O1  | 2.267 | 2 | S |
| Zr2 | O1  | 2.267 | 3 | S |
| Zr2 | O1  | 2.267 | 4 | S |
| Zr2 | O3  | 2.229 | 2 | S |
| Zr2 | O3  | 2.229 | 3 | S |
| Zr2 | O3  | 2.229 | 4 | S |

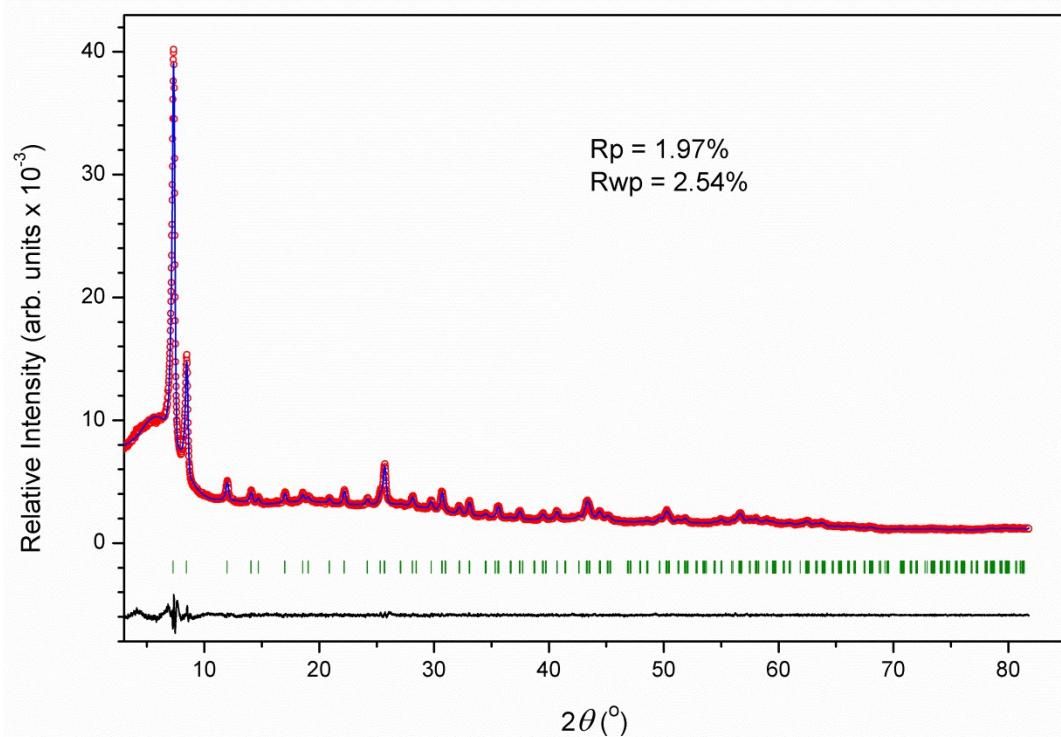

**Figure S13.** Structureless pattern profile refinement plot of **MOR-2@CrO<sub>4</sub><sup>2-</sup>** (space group:  $I4/m$ ) ( $\lambda_{\text{CuK}\alpha} = 1.54056$ ). Red: experimental points; blue: calculated points; green: Bragg peaks; black: difference pattern (exp.-calc.).

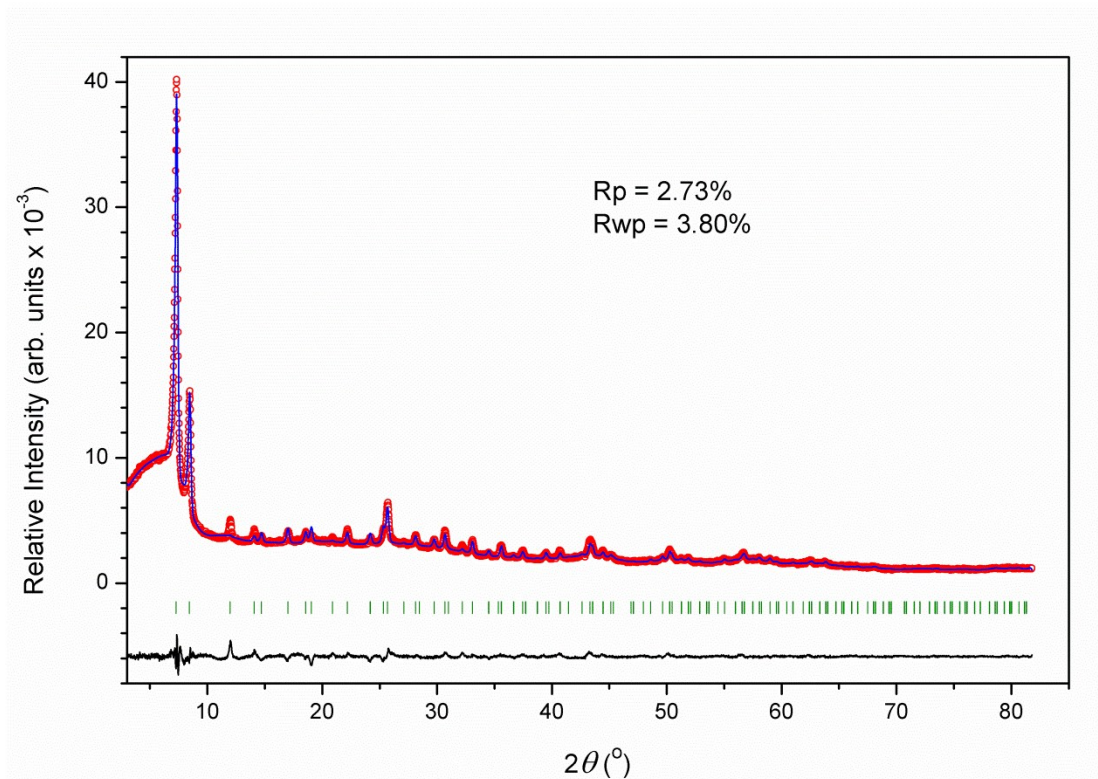

**Figure S14.** Rietveld plot of **MOR-2@CrO<sub>4</sub><sup>2-</sup>**. Red: experimental points; blue: calculated points; green: Bragg peaks; black: difference pattern (exp. – calc.).

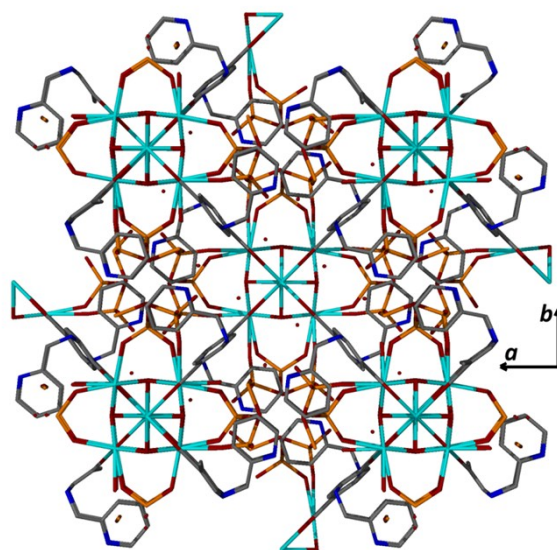

**Figure S15.** A packing diagram of **MOR-2@CrO<sub>4</sub><sup>2-</sup>** down to *c* axis. Color code: Zr, sky blue; O, red; C, grey; N, blue; Cr, orange.

```

data_MOR-2@CrO42-
_audit_creation_date      2017-04-03
_audit_creation_method    'Materials Studio'
_symmetry_space_group_name_H-M  'I4/M'
_symmetry_Int_Tables_number  87
_symmetry_cell_setting    tetragonal
loop_
_symmetry_equiv_pos_as_xyz
  x,y,z
  -x,-y,z
  -y,x,z
  y,-x,z
  -x,-y,-z
  x,y,-z
  y,-x,-z
  -y,x,-z
  x+1/2,y+1/2,z+1/2
  -x+1/2,-y+1/2,z+1/2
  -y+1/2,x+1/2,z+1/2
  y+1/2,-x+1/2,z+1/2
  -x+1/2,-y+1/2,-z+1/2
  x+1/2,y+1/2,-z+1/2
  y+1/2,-x+1/2,-z+1/2
  -y+1/2,x+1/2,-z+1/2
_cell_length_a           14.671(2)
_cell_length_b           14.671(2)
_cell_length_c           20.730(4)
_cell_angle_alpha        90.0000
_cell_angle_beta         90.0000
_cell_angle_gamma        90.0000
loop_
_atom_site_label
_atom_site_type_symbol
_atom_site_fract_x
_atom_site_fract_y
_atom_site_fract_z
_atom_site_U_iso_or_equiv
_atom_site_adp_type
_atom_site_occupancy
O1  O  -0.00114  0.13240  0.06281  0.05000  Uiso  1.00
O4  O   0.16994  0.16994  0.09488  0.08000  Uiso  1.00
O3  O   0.09501  0.09501  0.16972  0.08000  Uiso  1.00
C1  C   0.15328  0.15328  0.15305  0.08000  Uiso  1.00
C2  C   0.20196  0.20196  0.20069  0.08000  Uiso  1.00
C3  C   0.19690  0.17602  0.26487  0.08000  Uiso  1.00
C4  C   0.25521  0.27621  0.18326  0.08000  Uiso  1.00

```

|      |    |          |          |          |         |      |      |
|------|----|----------|----------|----------|---------|------|------|
| N1   | N  | 0.28248  | 0.29817  | 0.11946  | 0.10000 | Uiso | 0.50 |
| C9   | C  | 0.37195  | 0.26046  | 0.10206  | 0.10000 | Uiso | 0.50 |
| C10  | C  | 0.38953  | 0.16984  | 0.13440  | 0.10000 | Uiso | 0.50 |
| C11  | C  | 0.32063  | 0.10856  | 0.13652  | 0.10000 | Uiso | 0.50 |
| N2   | N  | 0.47380  | 0.14581  | 0.16119  | 0.10000 | Uiso | 0.50 |
| C14  | C  | 0.48385  | 0.06033  | 0.18928  | 0.10000 | Uiso | 0.50 |
| C13  | C  | 0.41059  | -0.00106 | 0.19104  | 0.10000 | Uiso | 0.50 |
| C12  | C  | 0.32892  | 0.02549  | 0.16356  | 0.10000 | Uiso | 0.50 |
| Cr1A | Cr | 0.49785  | 0.83245  | 0.48316  | 0.10000 | Uiso | 0.25 |
| O2A  | O  | 0.49512  | 0.87439  | 0.41052  | 0.10000 | Uiso | 0.25 |
| O4A  | O  | 0.40931  | 0.76761  | 0.49494  | 0.10000 | Uiso | 0.25 |
| O1A  | O  | 0.59033  | 0.77239  | 0.49238  | 0.10000 | Uiso | 0.25 |
| O3A  | O  | 0.49612  | 0.91553  | 0.53518  | 0.10000 | Uiso | 0.25 |
| O5B  | O  | 0.62544  | 0.77011  | 0.48343  | 0.10000 | Uiso | 0.25 |
| O7B  | O  | 0.68957  | 0.93843  | 0.46680  | 0.10000 | Uiso | 0.25 |
| O6B  | O  | 0.63224  | 0.88479  | 0.58192  | 0.10000 | Uiso | 0.25 |
| O4B  | O  | 0.50503  | 0.91971  | 0.48310  | 0.10000 | Uiso | 0.25 |
| O3B  | O  | 0.38745  | 0.89013  | 0.58646  | 0.10000 | Uiso | 0.25 |
| O2B  | O  | 0.32004  | 0.94565  | 0.47427  | 0.10000 | Uiso | 0.25 |
| O1B  | O  | 0.38126  | 0.77539  | 0.48845  | 0.10000 | Uiso | 0.25 |
| Cr2B | Cr | 0.61711  | 0.87555  | 0.50484  | 0.10000 | Uiso | 0.25 |
| Cr1B | Cr | 0.39405  | 0.88030  | 0.50930  | 0.10000 | Uiso | 0.25 |
| O1W  | O  | -0.16010 | 1.05954  | -0.57095 | 0.12000 | Uiso | 0.73 |
| Zr1  | Zr | 0.11954  | 0.11954  | 0.00000  | 0.05000 | Uiso | 1.00 |
| Zr2  | Zr | 0.00000  | 0.00000  | 0.11939  | 0.05000 | Uiso | 1.00 |

loop\_

\_geom\_bond\_atom\_site\_label\_1

\_geom\_bond\_atom\_site\_label\_2

\_geom\_bond\_distance

\_geom\_bond\_site\_symmetry\_2

\_ccdc\_geom\_bond\_type

|    |     |       |    |   |
|----|-----|-------|----|---|
| O1 | Zr1 | 2.206 | .  | S |
| O1 | Zr2 | 2.269 | .  | S |
| O1 | Zr1 | 2.179 | 3  | S |
| O4 | C1  | 1.254 | .  | S |
| O4 | Zr1 | 2.228 | .  | S |
| O3 | C1  | 1.257 | .  | S |
| O3 | Zr2 | 2.230 | .  | S |
| C1 | C2  | 1.413 | .  | S |
| C2 | C3  | 1.386 | .  | S |
| C2 | C4  | 1.388 | .  | S |
| C3 | C4  | 1.463 | 13 | S |
| C4 | N1  | 1.419 | .  | S |
| C4 | C3  | 1.463 | 13 | S |
| N1 | C9  | 1.469 | .  | S |
| C9 | C10 | 1.511 | .  | S |

|      |      |       |   |   |
|------|------|-------|---|---|
| C10  | C11  | 1.353 | . | S |
| C10  | N2   | 1.401 | . | S |
| C11  | C12  | 1.347 | . | S |
| N2   | C14  | 1.391 | . | S |
| C14  | C13  | 1.403 | . | S |
| C13  | C12  | 1.383 | . | S |
| Cr1A | O2A  | 1.627 | . | S |
| Cr1A | O4A  | 1.628 | . | S |
| Cr1A | O1A  | 1.629 | . | S |
| Cr1A | O3A  | 1.628 | . | S |
| O5B  | Cr2B | 1.614 | . | S |
| O7B  | Cr2B | 1.613 | . | S |
| O6B  | Cr2B | 1.619 | . | S |
| O4B  | Cr2B | 1.824 | . | S |
| O4B  | Cr1B | 1.811 | . | S |
| O3B  | Cr1B | 1.609 | . | S |
| O2B  | Cr1B | 1.620 | . | S |
| O1B  | Cr1B | 1.610 | . | S |
| Zr1  | O4   | 2.228 | 6 | S |
| Zr1  | O1   | 2.206 | 6 | S |
| Zr1  | O1   | 2.179 | 4 | S |
| Zr1  | O1   | 2.179 | 7 | S |
| Zr2  | O1   | 2.269 | 2 | S |
| Zr2  | O1   | 2.269 | 3 | S |
| Zr2  | O1   | 2.269 | 4 | S |
| Zr2  | O3   | 2.230 | 2 | S |
| Zr2  | O3   | 2.230 | 3 | S |
| Zr2  | O3   | 2.230 | 4 | S |

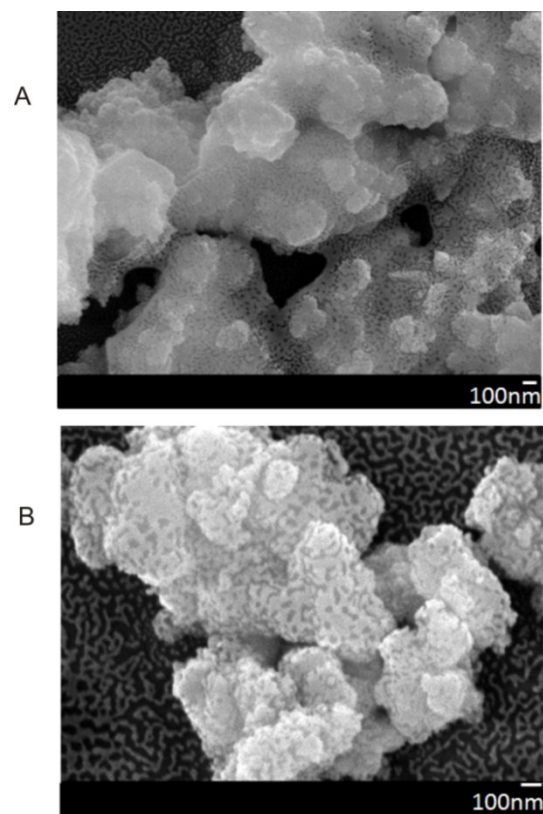

**Figure S16.** FE-SEM images of A. **MOR-2** and B. **MOR-2-HA**.

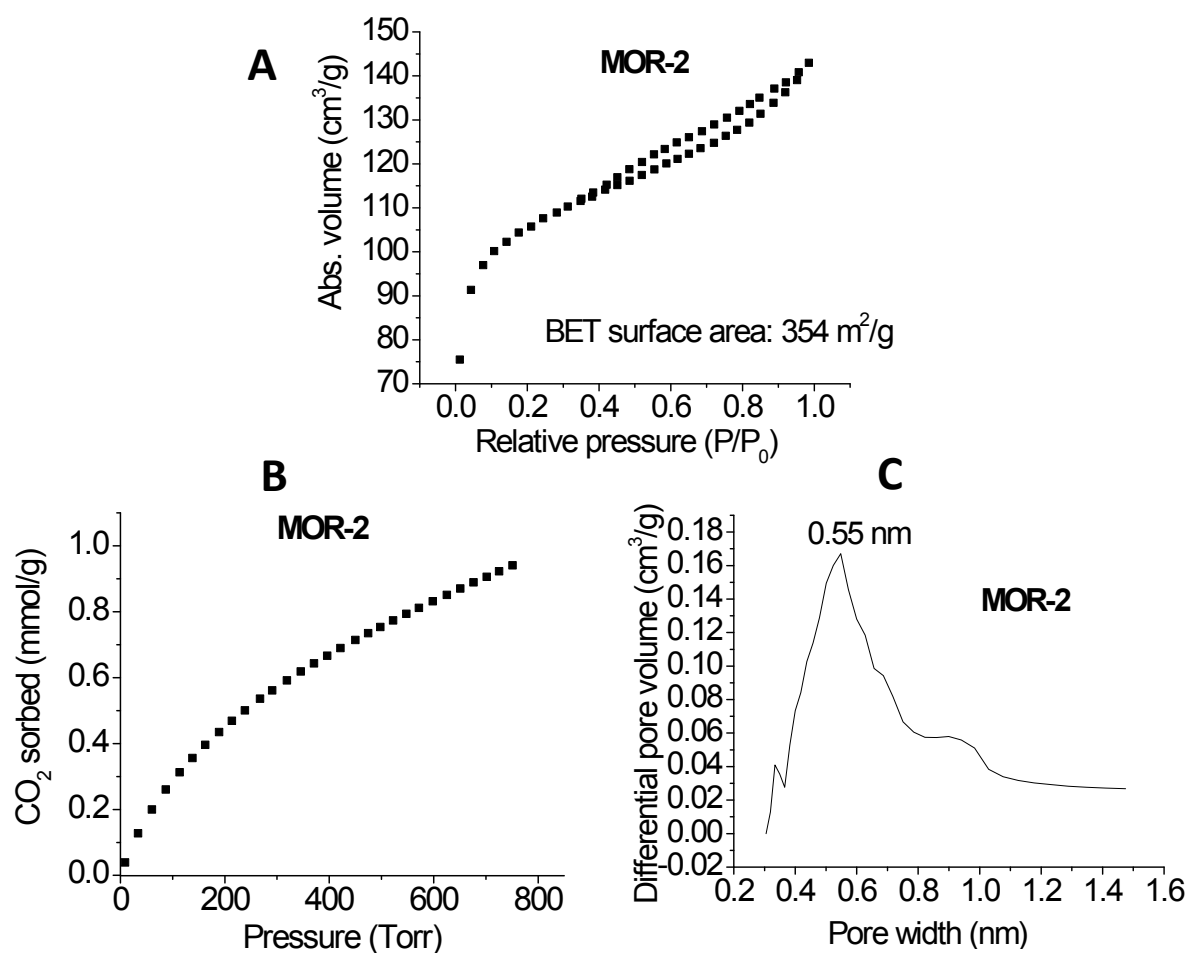

**Figure S17.** A) Nitrogen sorption isotherm at 77 K, B) CO<sub>2</sub> adsorption isotherm at 273 K and C) the resultant DFT micropore size distribution (assuming slit-type pores) for **MOR-2**. The DFT analysis of the adsorption data indicates a pore size of ~ 0.55 nm.

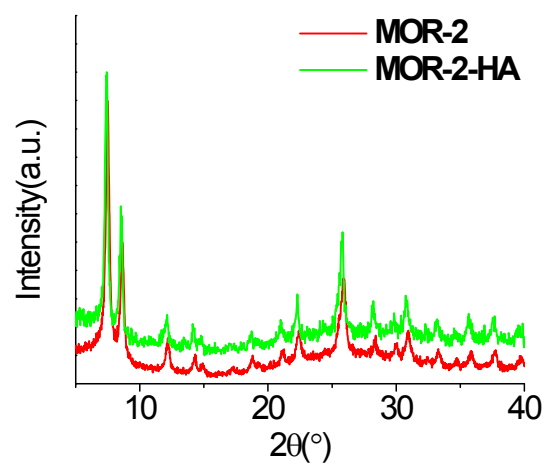

**Figure S18.** PXRD pattern of **MOR-2-HA** vs. that of **MOR-2**.

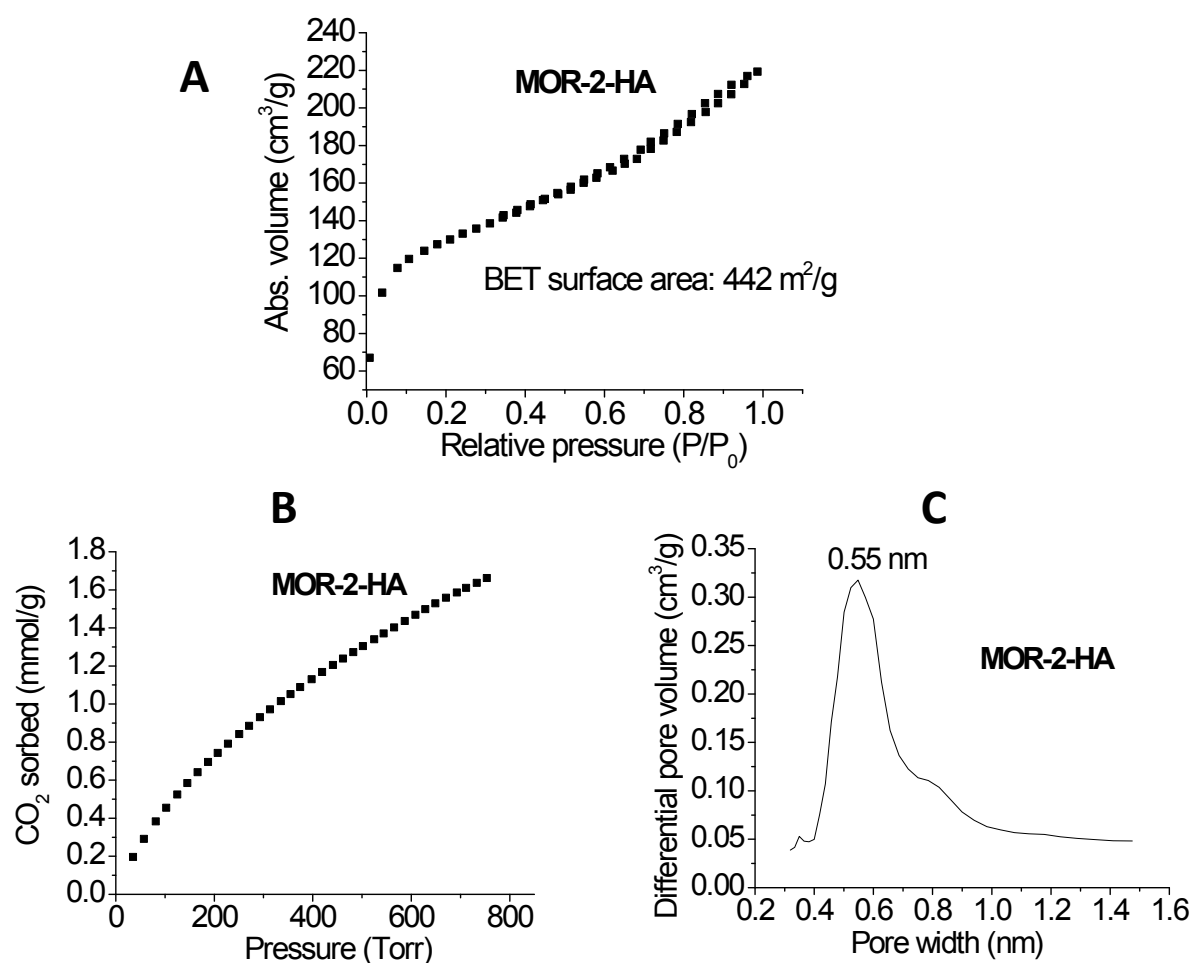

**Figure S19.** A) Nitrogen sorption isotherm at 77 K, B) CO<sub>2</sub> adsorption isotherm at 273 K and C) the resultant DFT micropore size distribution (assuming slit-type pores) for **MOR-2-HA**. The DFT analysis of the adsorption data indicates a pore size of ~ 0.55 nm.

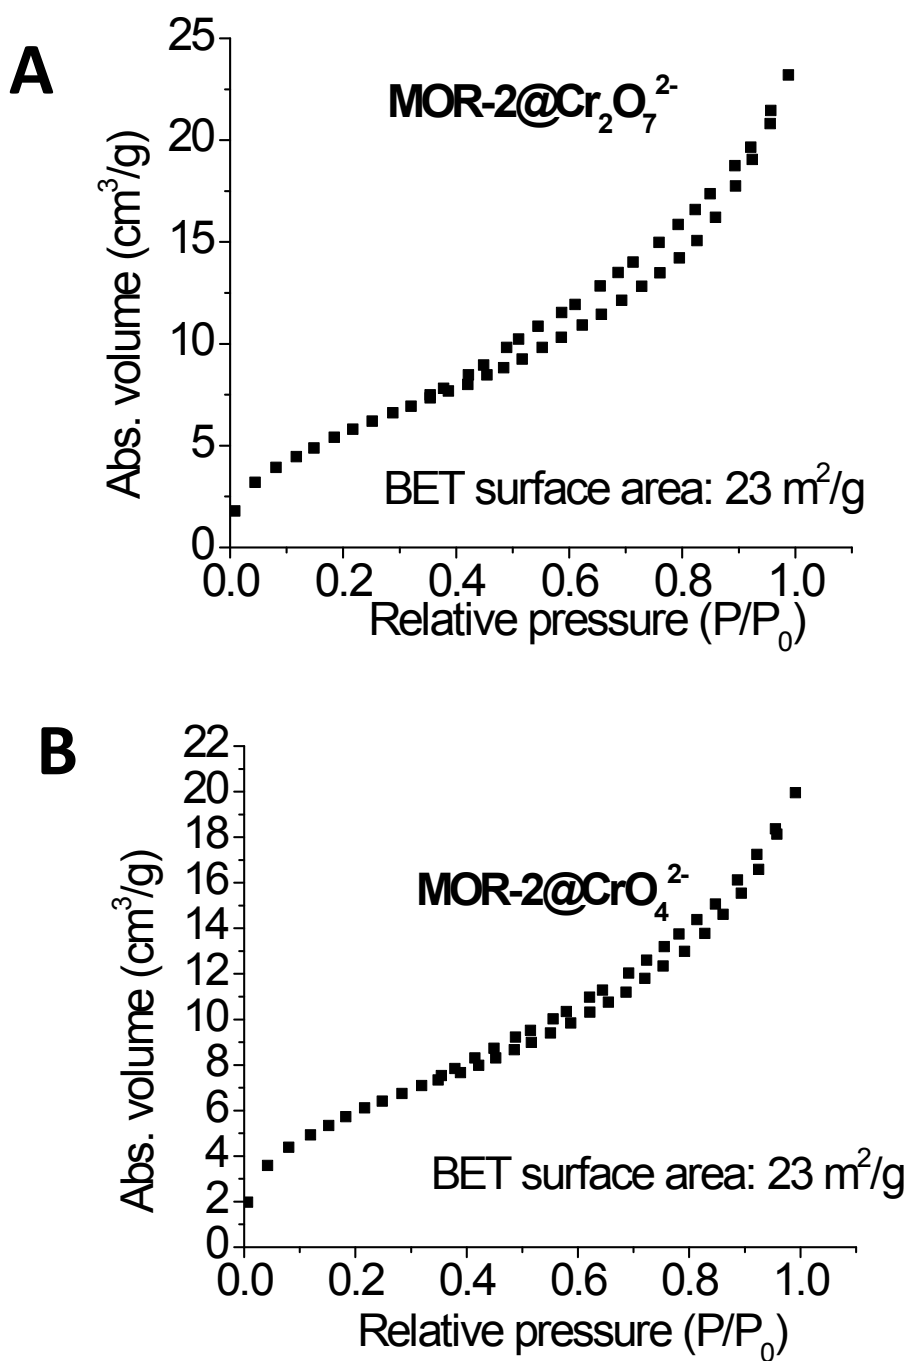

**Figure S20.** Nitrogen sorption isotherms at 77 K for A) **MOR-2@Cr<sub>2</sub>O<sub>7</sub><sup>2-</sup>** and B) **MOR-2@CrO<sub>4</sub><sup>2-</sup>**.

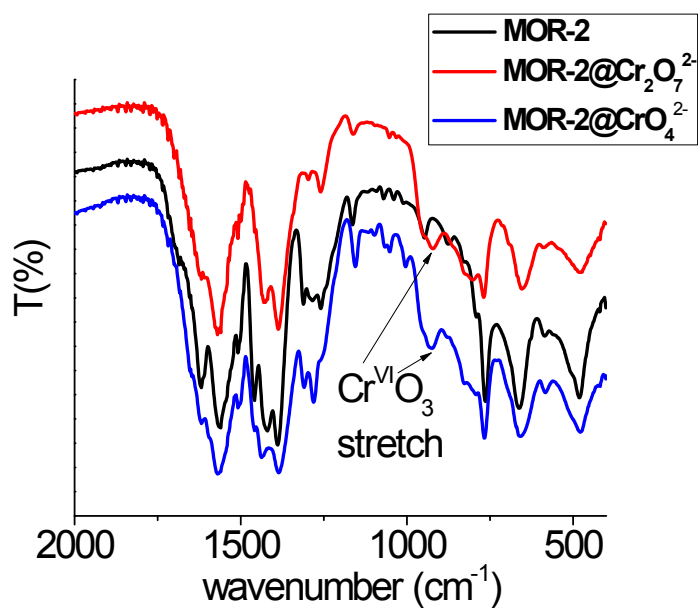

**Figure S21.** IR spectra of **MOR-2** and **MOR@Cr(VI)** materials.

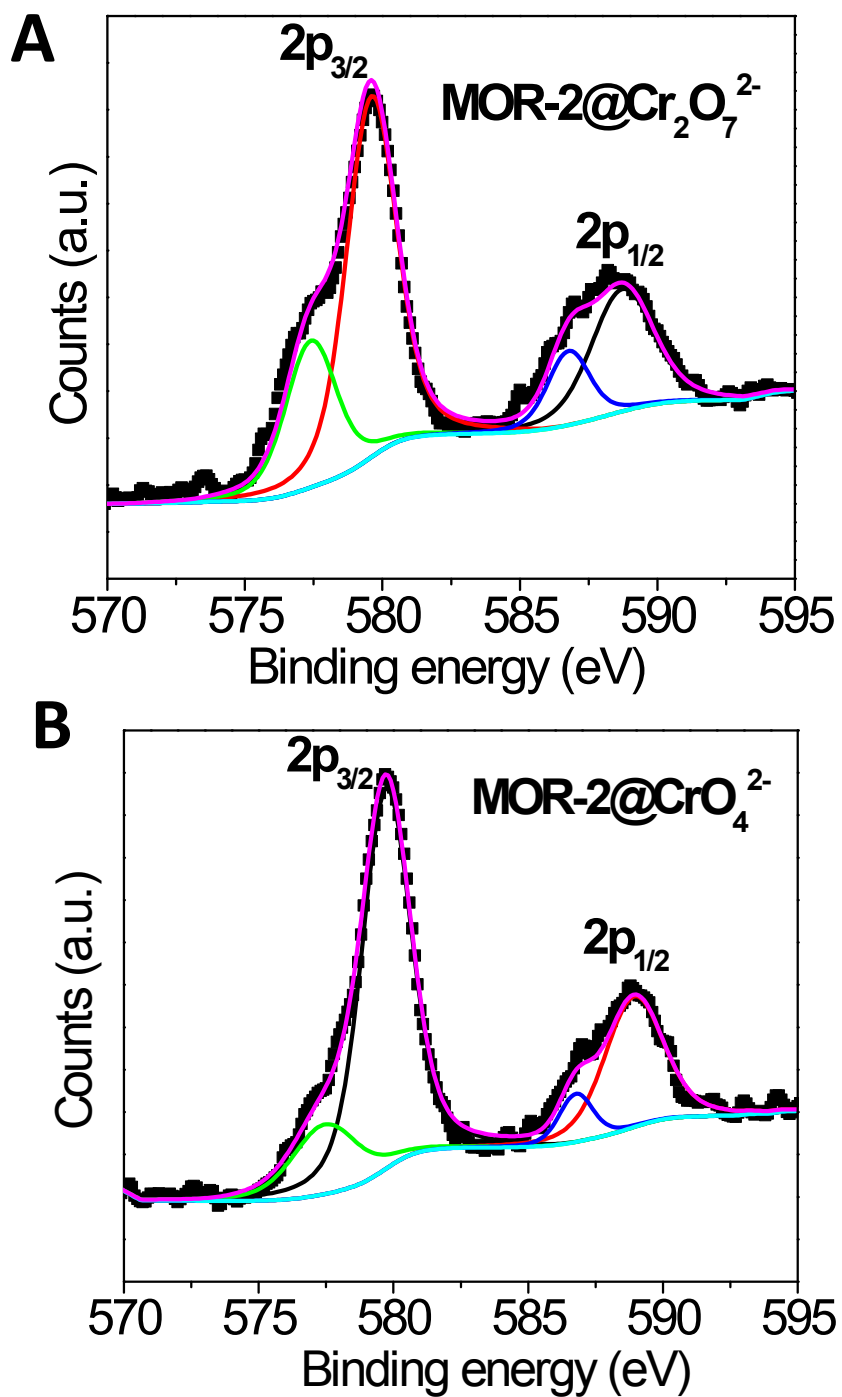

**Figure S22.** High resolution Cr<sub>2p<sub>1/2</sub></sub> and Cr<sub>2p<sub>3/2</sub></sub> core-level photoelectron spectra of **MOR-2@Cr<sub>2</sub>O<sub>7</sub><sup>2-</sup>** (A) and **MOR-2@CrO<sub>4</sub><sup>2-</sup>** (B) as well as their de-convolution into two components. The main Cr<sub>2p<sub>1/2</sub></sub>/Cr<sub>2p<sub>3/2</sub></sub> peak components appear at 588.7/579.6 and 588.9/579.7 for **MOR-**

**2@Cr<sub>2</sub>O<sub>7</sub><sup>2-</sup>** and **MOR-2@CrO<sub>4</sub><sup>2-</sup>** respectively. These binding energies are consistent with Cr(VI).<sup>6</sup> The minor signals with binding energy at 586.8 and 577.4 eV, present for both **MOR-2@Cr<sub>2</sub>O<sub>7</sub><sup>2-</sup>** and **MOR-2@CrO<sub>4</sub><sup>2-</sup>**, are due to Cr(III) traces produced from the reduction effects under X-ray irradiation.<sup>11</sup>

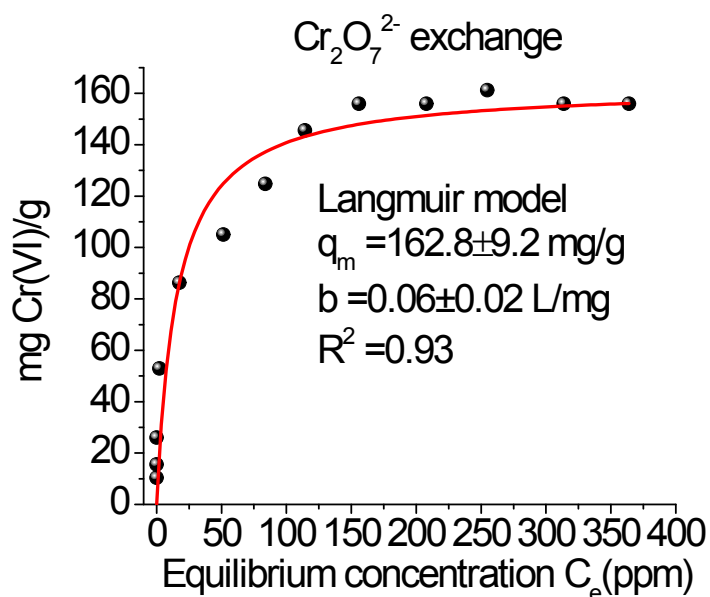

**Figure S23.** Isotherm dichromate ion exchange data for **MOR-2-HA**. The red line represents the fitting of the data with the Langmuir model.

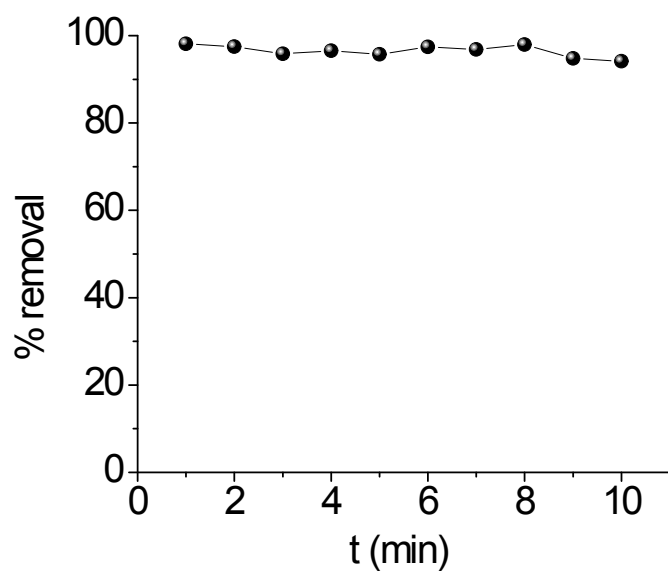

**Figure S24.** The kinetics of dichromate ion exchange for **MOR-2-HA** (initial dichromate concentration = 21.6 ppm, pH~3).

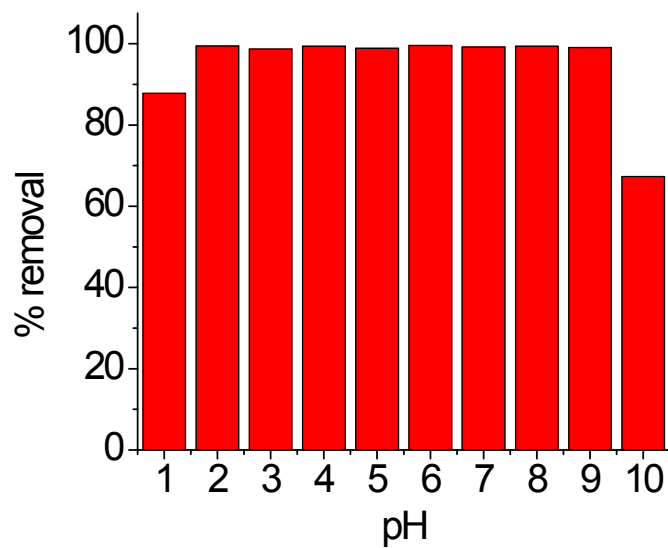

**Figure S25.** Total Cr removal (%) by **MOR-2** vs. pH (initial total Cr concentration = 10.4 ppm).

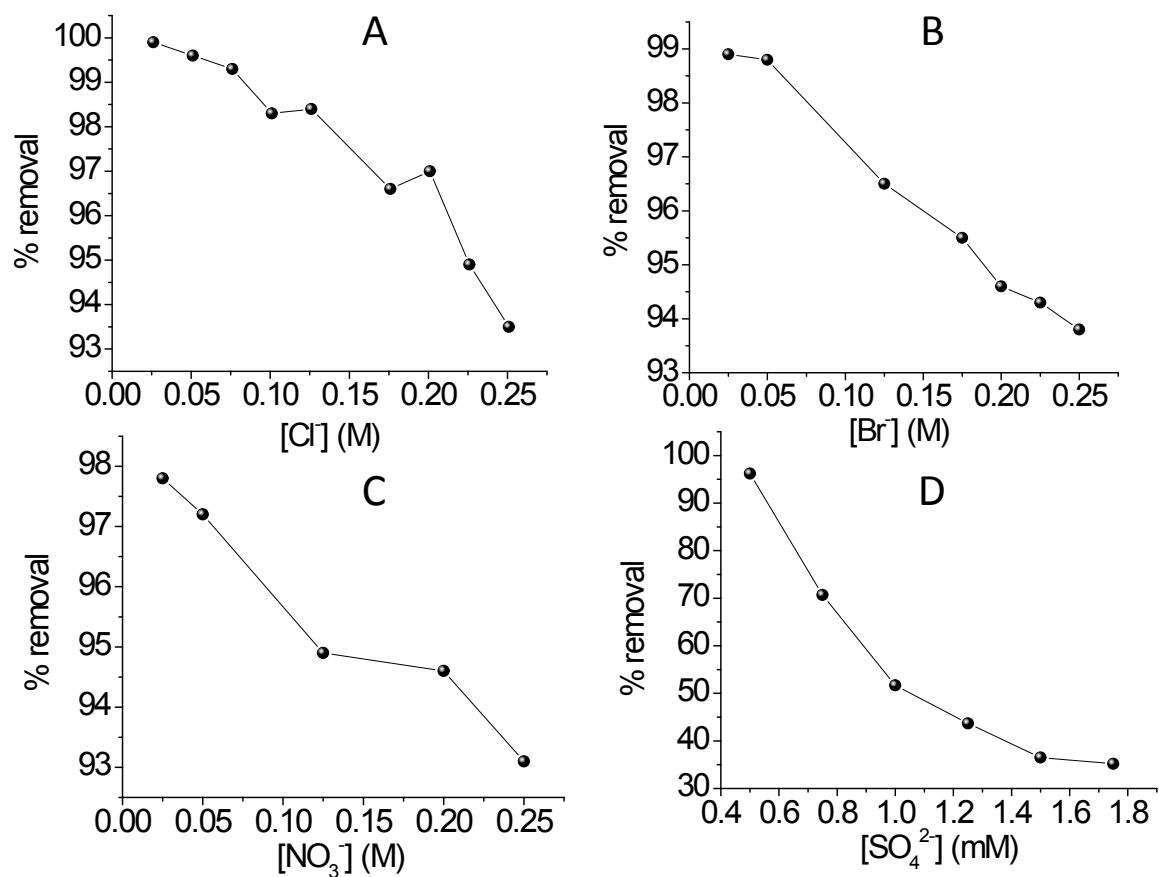

**Figure S26.** Selectivity ion exchange data, presented as % dichromate removal vs. A)  $\text{Cl}^-$ , B)  $\text{Br}^-$ , C)  $\text{NO}_3^-$  and D)  $\text{SO}_4^{2-}$  concentrations. The initial dichromate concentration was 0.25 mM (pH~3).

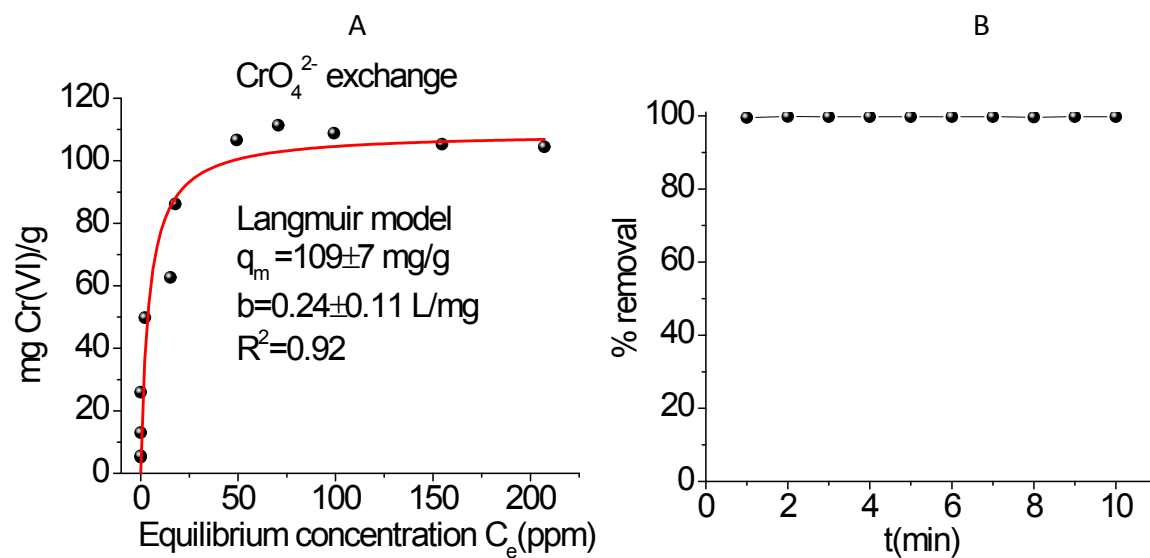

**Figure S27.** A. Isotherm  $\text{CrO}_4^{2-}$  exchange data and B. Kinetics of  $\text{CrO}_4^{2-}$  exchange data (initial chromate concentration = 11.6 ppm, pH ~ 7) for **MOR-2-HA**.

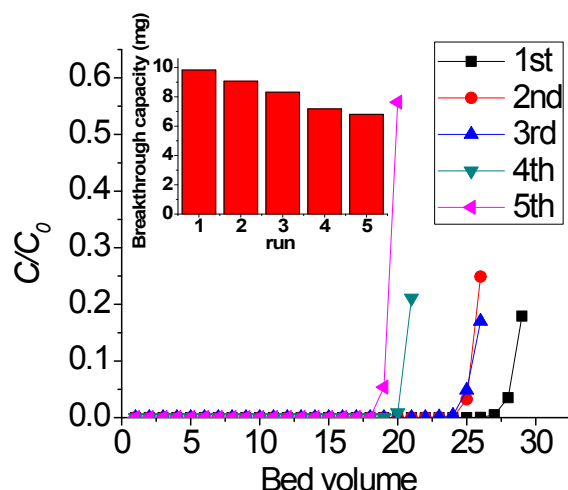

**Figure S28.** Breakthrough curves for five column ion exchange runs ( $C = \text{Cr}_2\text{O}_7^{2-}$  concentration of the effluent,  $C_0 = \text{initial Cr}_2\text{O}_7^{2-}$  concentration = 108 ppm, pH~ 3, flow rate ~ 1 mL/min, one bed volume = 3.5 mL, stationary phase **MOR-2-HA**/sand = 0.1 g:5 g). The lines are only a guide for the eye. Inset: Breakthrough capacities obtained from the five column ion exchange runs.

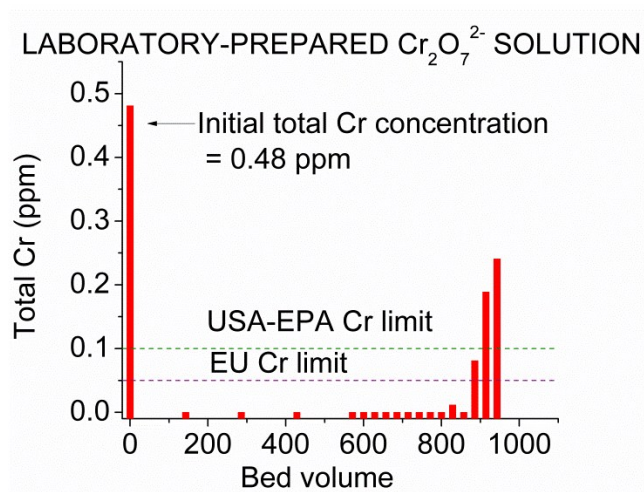

**Figure S29.** Total Cr content (ppm) vs. bed volume (1 bed vole = 3.5 mL) of a dichromate aqueous solution (initial total concentration = 0.48 ppm, pH~ 3), after passing it through the **MOR-2-HA**/sand column (flow rate ~ 1.75 mL/min, stationary phase **MOR-2-HA**/sand = 0.05 g:5 g).

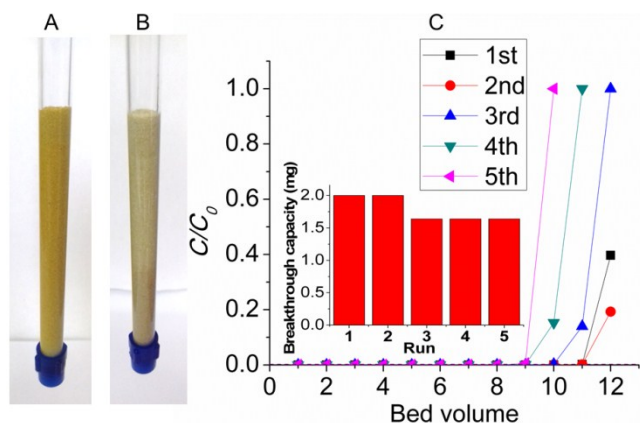

**Figure S30.** A.  $\text{CrO}_4^{2-}$ -loaded column B. Column after the regeneration process (it looks identical with the pristine one). C. Breakthrough curves for five column ion exchange runs ( $C = \text{CrO}_4^{2-}$  concentration of the effluent,  $C_0 = \text{initial CrO}_4^{2-}$  concentration = 52 ppm, pH ~ 7, flow rate ~ 1.0 mL/min, one bed volume = 3.5 mL, stationary phase MOR-2-HA/sand = 0.1 g:5 g). The lines are only a guide for the eye. Inset: Breakthrough capacities obtained from the five column ion exchange runs.

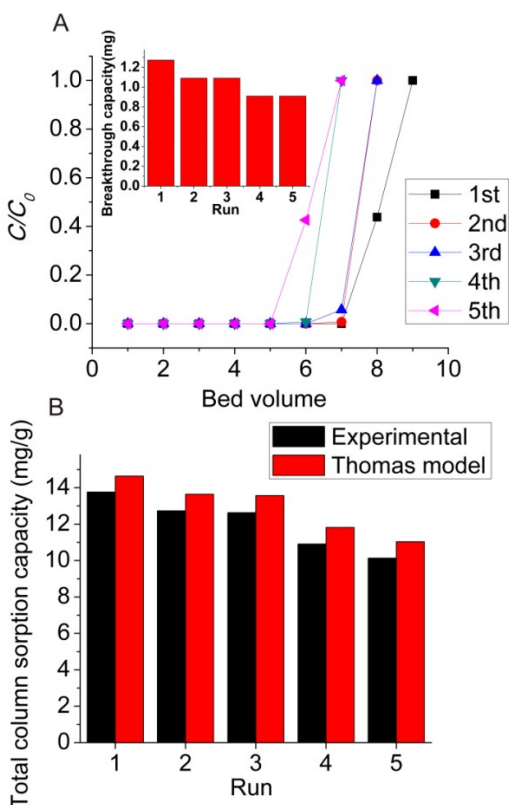

**Figure S31.** A. Breakthrough curves for five column ion exchange runs with the chrome plating solution B ( $C = \text{CrO}_4^{2-}$  concentration of the effluent,  $C_0 = \text{initial CrO}_4^{2-}$  concentration = 52 ppm, pH ~ 8, flow rate ~ 1.0 mL/min, one bed volume = 3.5 mL, stationary phase **MOR-2-HA**/sand = 0.1 g:5 g). The lines are only a guide for the eye. Inset: Breakthrough capacities obtained from the five column ion exchange runs. B. The predicted (by the Thomas model) and experimentally found total column sorption capacities.

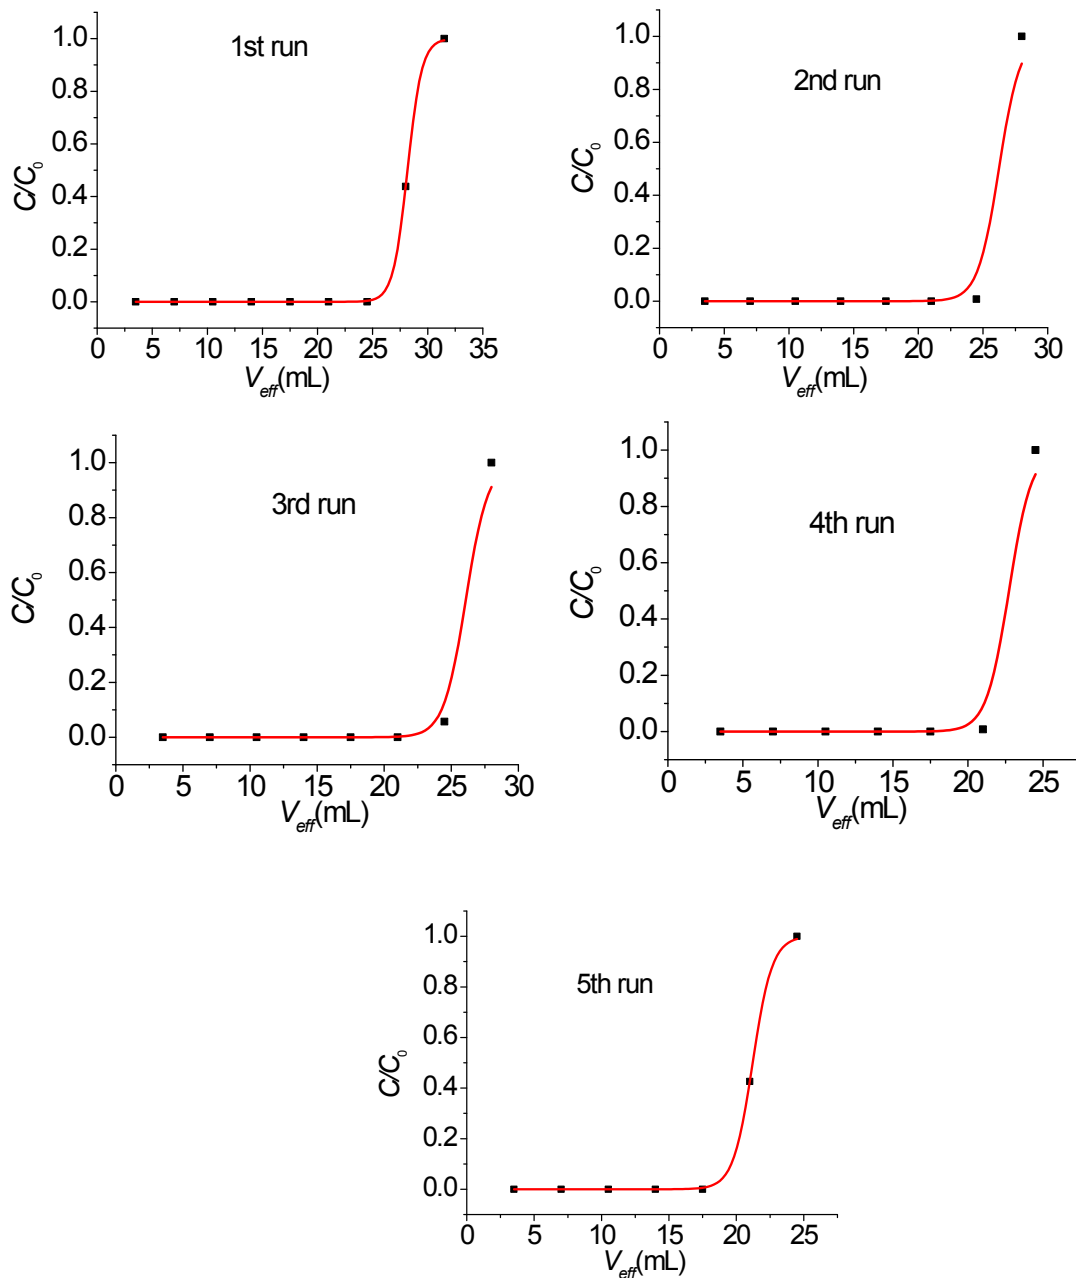

**Figure S32.** Fitting of the breakthrough curves (red line) for the column sorption experiments with the chrome plating wastewater sample B. The data are fitted with an equation (Thomas

model) of the type  $y = \frac{1}{1 + \exp(A - Bx)}$ , where  $A = \frac{k_{Th} q_{max} m}{Q}$ ,  $B = \frac{k_{Th} C_0}{Q}$ .

The results of the fitting are shown in Table S1.

**Table S1.** Fitting of the column sorption data and the experimentally found  $q_{\max}$  values.

| Run      | Fitting results |       |       | Thomas model parameters                            |                         | Exp. found<br>$q_{\max}(\text{mg/g})$ |
|----------|-----------------|-------|-------|----------------------------------------------------|-------------------------|---------------------------------------|
|          | A               | B     | $R^2$ | $k_{Th}$<br>( $\text{L mg}^{-1} \text{min}^{-1}$ ) | $q_{\max}(\text{mg/g})$ |                                       |
| <b>1</b> | 43.155          | 1.533 | 0.999 | 0.029481                                           | 14.64                   | 13.76                                 |
| <b>2</b> | 32.209          | 1.228 | 0.973 | 0.023615                                           | 13.64                   | 12.73                                 |
| <b>3</b> | 31.645          | 1.213 | 0.983 | 0.023327                                           | 13.57                   | 12.63                                 |
| <b>4</b> | 30.368          | 1.336 | 0.980 | 0.025692                                           | 11.82                   | 10.91                                 |
| <b>5</b> | 29.324          | 1.382 | 0.999 | 0.026577                                           | 11.03                   | 10.13                                 |

## Computational Details

Geometry optimizations, without symmetry constraints, were performed using the BP86 GGA functional<sup>12,13</sup> in combination with the 6-31G(d,p) basis set for all elements. All calculations were performed for aqueous solutions of the interacting species using the Polarizable Continuum Model (PCM) for solvation as implemented in the Gaussian 09 program suite.<sup>14</sup> The computational protocol used is denoted as BP86/6-31G(d,p)/PCM. All stationary points were verified as minima (number of imaginary frequencies  $N_{\text{imag}}=0$ ). The results are shown in Table S2.

**Table S2.** Thermodynamics ( $\Delta H$  in kcal/mol) of possible reactions involved in the oxido-Cr(VI) anion exchange processes with **MOR-2** calculated at the BP86/6-31G(d,p) level of theory.

| Reaction                                                                                                                            | $\Delta H$ (kcal/mol) |
|-------------------------------------------------------------------------------------------------------------------------------------|-----------------------|
| $[\text{PhNH}_2\text{CH}_2\text{Py}]^+ + \text{H}^+ \rightarrow [\text{PhNH}_2\text{CH}_2\text{PyH}]^{2+}$                          | -157.5                |
| $[\text{PhNHCH}_2\text{PyH}]^+ + \text{H}^+ \rightarrow [\text{PhNH}_2\text{CH}_2\text{PyH}]^{2+}$                                  | -151.7                |
| $\text{CrO}_4^{2-} + \text{H}^+ \rightarrow \text{HCrO}_4^-$                                                                        | -203.0                |
| $\text{Cr}_2\text{O}_7^{2-} + \text{H}^+ \rightarrow \text{HCr}_2\text{O}_7^-$                                                      | -164.5                |
| $[\text{PhNH}_2\text{CH}_2\text{PyH}]^{2+} + \text{CrO}_4^{2-} \rightarrow [\text{PhNH}_2\text{CH}_2\text{Py}]^+ + \text{HCrO}_4^-$ | -45.1                 |
| $[\text{PhNH}_2\text{CH}_2\text{PyH}]^{2+} + \text{CrO}_4^{2-} \rightarrow [\text{PhNHCH}_2\text{PyH}]^+ + \text{HCrO}_4^-$         | -51.3                 |

|                                                                                                                                                        |       |
|--------------------------------------------------------------------------------------------------------------------------------------------------------|-------|
| $[\text{PhNH}_2\text{CH}_2\text{PyH}]^{2+} + \text{Cr}_2\text{O}_7^{2-} \rightarrow [\text{PhNH}_2\text{CH}_2\text{Py}]^+ + \text{HCr}_2\text{O}_7^-$  | -7.1  |
| $[\text{PhNH}_2\text{CH}_2\text{PyH}]^{2+} + \text{Cr}_2\text{O}_7^{2-} \rightarrow [\text{PhNH}_2\text{CH}_2\text{PyH}]^+ + \text{HCr}_2\text{O}_7^-$ | -12.8 |
| $[\text{PhNH}_2\text{CH}_2\text{PyH}]^{2+} + \text{CrO}_4^{2-} \rightarrow [\text{PhNH}_2\text{CH}_2\text{PyH}(\text{CrO}_4^{2-})]$                    | -59.6 |
| $[\text{PhNH}_2\text{CH}_2\text{PyH}]^{2+} + \text{CrO}_4^{2-} \rightarrow [\text{PhNH}_2(\text{CrO}_4^{2-})\text{CH}_2\text{PyH}]$                    | -61.3 |
| $[\text{PhNH}_2\text{CH}_2\text{Py}]^+ + \text{HOCrO}_3^- \rightarrow [\text{PhNH}_2\text{CH}_2\text{Py}(\text{HOCrO}_3^-)]$                           | -11.6 |
| $[\text{PhNH}_2\text{CH}_2\text{PyH}]^{2+} + \text{HOCrO}_3^- \rightarrow [\text{PhNH}_2\text{CH}_2\text{PyH}(\text{HOCrO}_3^-)]^+$                    | -23.9 |
| $[\text{PhNH}_2\text{CH}_2\text{PyH}]^{2+} + \text{Cr}_2\text{O}_7^{2-} \rightarrow [\text{PhNH}_2\text{CH}_2\text{PyH}(\text{Cr}_2\text{O}_7^{2-})]$  | -37.3 |

Calculations were also performed using the dispersion-corrected wB97XD density functional<sup>15</sup> in combination with the Def2-TZVPPD basis set for all elements.<sup>16</sup> However, most of the calculations using the wB97XD/Def2-TZVPPD/PCM computational protocol failed, due to SCF convergence problems. In the cases where calculations performed successfully the results obtained (Table S3) are almost identical to those obtained using the BP86/6-31G(d,p)/PCM protocol.

**Table S3.** Thermodynamics ( $\Delta H$  in kcal/mol) of possible reactions involved in the oxido-Cr(VI) anion exchange processes with **MOR-2** calculated at the wB97XD/Def2-TZVPP level of theory.

| Reaction                                                                                                                                              | $\Delta H$ (kcal/mol)        |
|-------------------------------------------------------------------------------------------------------------------------------------------------------|------------------------------|
| $[\text{PhNH}_2\text{CH}_2\text{Py}]^+ + \text{H}^+ \rightarrow [\text{PhNH}_2\text{CH}_2\text{PyH}]^{2+}$                                            | -160.4 (-157.5) <sup>a</sup> |
| $[\text{PhNHCH}_2\text{PyH}]^+ + \text{H}^+ \rightarrow [\text{PhNH}_2\text{CH}_2\text{PyH}]^{2+}$                                                    | -152.0 (-151.7)              |
| $\text{CrO}_4^{2-} + \text{H}^+ \rightarrow \text{HCrO}_4^-$                                                                                          | -194.6 (-203.0)              |
| $\text{Cr}_2\text{O}_7^{2-} + \text{H}^+ \rightarrow \text{HCr}_2\text{O}_7^-$                                                                        | -164.2 (-164.5)              |
| $[\text{PhNH}_2\text{CH}_2\text{PyH}]^{2+} + \text{CrO}_4^{2-} \rightarrow [\text{PhNH}_2\text{CH}_2\text{Py}]^+ + \text{HCrO}_4^-$                   | failed                       |
| $[\text{PhNH}_2\text{CH}_2\text{PyH}]^{2+} + \text{CrO}_4^{2-} \rightarrow [\text{PhNHCH}_2\text{PyH}]^+ + \text{HCrO}_4^-$                           | failed                       |
| $[\text{PhNH}_2\text{CH}_2\text{PyH}]^{2+} + \text{Cr}_2\text{O}_7^{2-} \rightarrow [\text{PhNH}_2\text{CH}_2\text{Py}]^+ + \text{HCr}_2\text{O}_7^-$ | failed                       |
| $[\text{PhNH}_2\text{CH}_2\text{PyH}]^{2+} + \text{Cr}_2\text{O}_7^{2-} \rightarrow [\text{PhNHCH}_2\text{PyH}]^+ + \text{HCr}_2\text{O}_7^-$         | failed                       |
| $[\text{PhNH}_2\text{CH}_2\text{PyH}]^{2+} + \text{CrO}_4^{2-} \rightarrow [\text{PhNHCH}_2\text{PyH}(\text{CrO}_4^{2-})]$                            | failed                       |
| $[\text{PhNH}_2\text{CH}_2\text{PyH}]^{2+} + \text{CrO}_4^{2-} \rightarrow [\text{PhNH}_2(\text{CrO}_4^{2-})\text{CH}_2\text{PyH}]$                   | failed                       |
| $[\text{PhNH}_2\text{CH}_2\text{Py}]^+ + \text{HOCrO}_3^- \rightarrow [\text{PhNHCH}_2\text{Py}(\text{HOCrO}_3^-)]$                                   | failed                       |

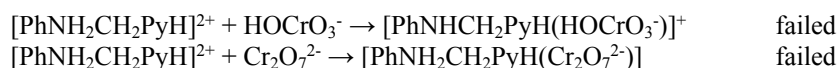

<sup>a</sup> Figures in parentheses are the results obtained by the BP86/6-31G(d,p)/PCM protocol.

## Discussion of the theoretical calculations

In aqueous solution hexavalent chromium exists as oxido- forms in a variety of species depending on pH and Cr(VI) concentration (see reference 1, main text) . For the oxo species of hexavalent chromium three main pH regions may be distinguished:

- (1)  $\text{H}_2\text{CrO}_4$  (pH < 0),
- (2)  $\text{HCrO}_4^-$  and  $\text{Cr}_2\text{O}_7^{2-}$  (pH 2–6),
- (3)  $\text{CrO}_4^{2-}$  (pH > 6).

Which entity will dominate in a particular environment depends upon the specific conditions, for example, pH,  $E_h$  (redox potential), total concentration of chromium, and the overall aqueous chemistry.

Therefore, we explored the possible interaction modes of **MOR-2@CrO<sub>4</sub><sup>2-</sup>**, **MOR-2@HCrO<sub>4</sub><sup>-</sup>** and **MOR-2@Cr<sub>2</sub>O<sub>7</sub><sup>2-</sup>** and the thermodynamics of possible reactions involved in the oxido- Cr(VI) anion exchange processes by means of DFT computational protocols (computational details are given above). The enthalpy changes ( $\Delta H$  in kcal/mol) of all possible reactions calculated at the BP86/6-31G(d,p) level of theory are given in Table S2. Comparable results are obtained employing the wB97XD/Def2-TZVPP DFT method (see above).

The proton affinities of pyridine and methylamine moieties of the PhNHCH<sub>2</sub>Py ligand used as a model of the PATP ligand predicted to be -157.5 and -151.7 kcal/mol respectively at the BP86/6-31G(d,p) level of theory indicate the slightly more basic character of pyridine than methylamine moieties. On the other hand, the proton affinities of CrO<sub>4</sub><sup>2-</sup> and Cr<sub>2</sub>O<sub>7</sub><sup>2-</sup> are predicted to be -203.0 and -164.5 kcal/mol respectively. The detachment of the proton either from the pyridinium or methylammonium moieties of the [PhNH<sub>2</sub>CH<sub>2</sub>PyH]<sup>2+</sup> ligand by the CrO<sub>4</sub><sup>2-</sup> dianions according to the reactions (eq. 1,2):

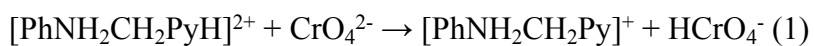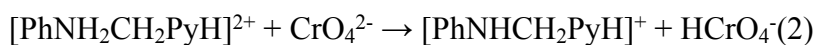

are slightly less exothermic (-45.1 kcal/mol) for the proton detachment process from pyridinium than methylammonium moieties (-51.3 kcal/mol). The deprotonation of the pyridinium or methylammonium moieties by the chromate anions is clearly shown in the structures of the [PhNH<sub>2</sub>CH<sub>2</sub>PyH(CrO<sub>4</sub>)] and [PhNH<sub>2</sub>(CrO<sub>4</sub>)CH<sub>2</sub>PyH] associations optimized at the BP86/6-31G(d,p) level of theory (Fig. S33).

It can be seen that the CrO<sub>4</sub><sup>2-</sup> anions deprotonating either the pyridinium or methylammonium moieties are transformed to HCrO<sub>4</sub><sup>-</sup> species that are associated with the [PhNHCH<sub>2</sub>Py] ligand through hydrogen bonds.

The HCrO<sub>4</sub><sup>-</sup> species interacting with the [PhNH<sub>2</sub>CH<sub>2</sub>Py]<sup>+</sup> and PhNH<sub>2</sub>CH<sub>2</sub>PyH]<sup>2+</sup> ligands yield the [PhNH<sub>2</sub>(HOCrO<sub>3</sub>)CH<sub>2</sub>Py] and PhNH<sub>2</sub>CH<sub>2</sub>PyH(HOCrO<sub>3</sub>)]<sup>+</sup> weak associations respectively supported by N-H...O-H hydrogen bonds (Fig. S33). The interaction energies for the [PhNH<sub>2</sub>(HOCrO<sub>3</sub>)CH<sub>2</sub>Py] and PhNH<sub>2</sub>CH<sub>2</sub>PyH(HOCrO<sub>3</sub>)]<sup>+</sup> associations are 11.6 and 23.9 kcal/mol respectively at the BP86/6-31G(d,p) level of theory.

Similarly the deprotonation of the pyridinium or methylammonium moieties of the  $[\text{PhNH}_2\text{CH}_2\text{PyH}]^{2+}$  ligand by the  $\text{Cr}_2\text{O}_7^{2-}$  dianions according to the reactions:

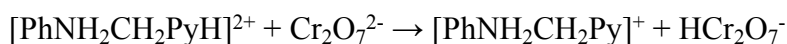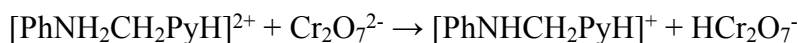

are predicted to be slightly exothermic, the estimated exothermicities being -7.1 and -12.8 kcal/mol respectively. Therefore the dichromate anions do not deprotonate the pyridinium or methylammonium moieties of the  $[\text{PhNH}_2\text{CH}_2\text{PyH}]^{2+}$  ligand, but interacting with  $[\text{PhNH}_2\text{CH}_2\text{PyH}]^{2+}$  ligand yields the weak association  $[\text{PhNH}_2\text{CH}_2\text{PyH}(\text{Cr}_2\text{O}_7)]$  supported by three hydrogen bonds (Fig. S33). The estimated interaction energy amounts to -37.3 kcal/mol.

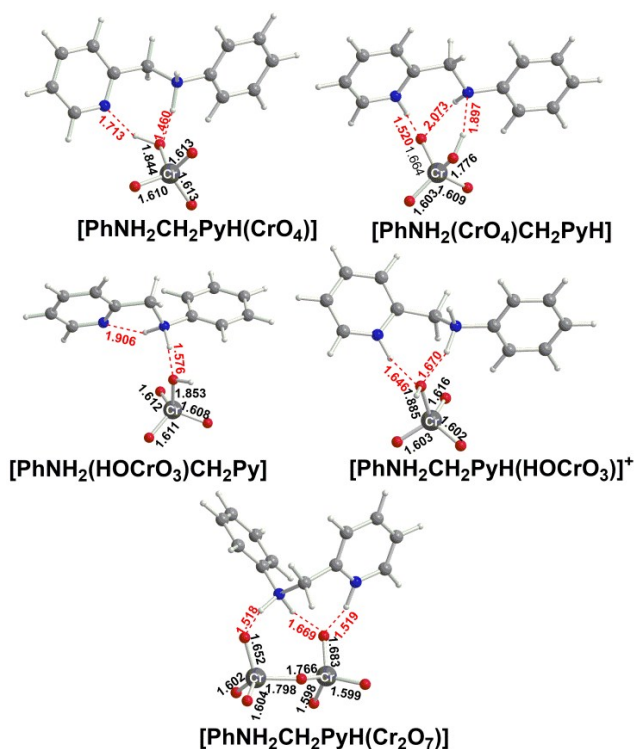

**Figure S33.** Possible associations of the functional groups of **MOR-2** with chromate and dichromate species optimized at the BP86/6-31G(d,p) level of theory (C, grey; H, white; N, blue; O, red).

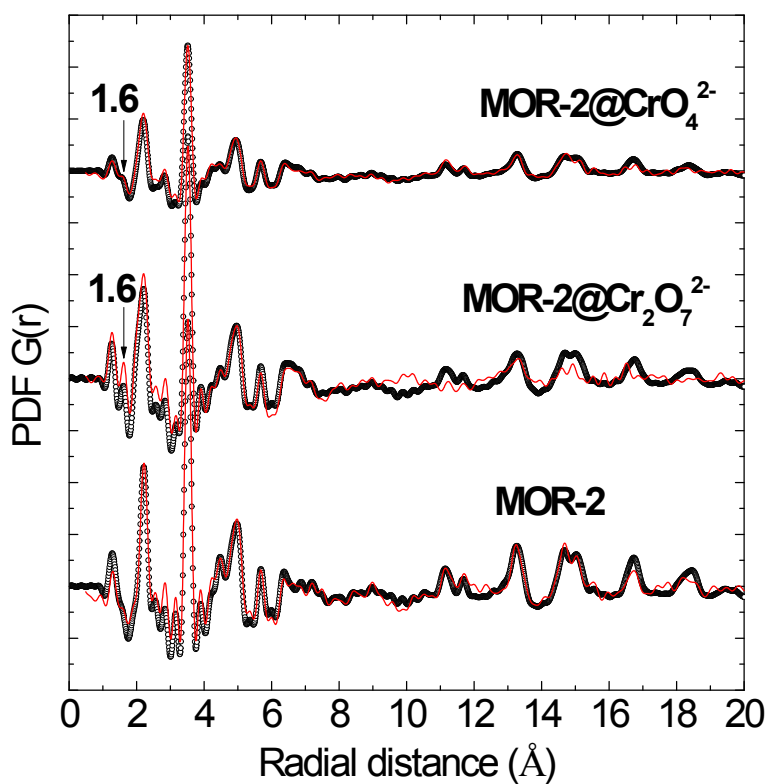

**Figure S34.** Pair distribution function plots (black dots) of **MOR-2**, **MOR-2@Cr<sub>2</sub>O<sub>7</sub><sup>2-</sup>** and **MOR-2@CrO<sub>4</sub><sup>2-</sup>**. Red lines represent the fitting of the PDF data using as starting structural models those obtained from Rietveld analysis. The features at  $\sim 1.6$  Å present in the PDF plots of **MOR-2@Cr<sub>2</sub>O<sub>7</sub><sup>2-</sup>** and **MOR-2@CrO<sub>4</sub><sup>2-</sup>** are due to the Cr=O bonds of the Cr(VI) oxoanions.

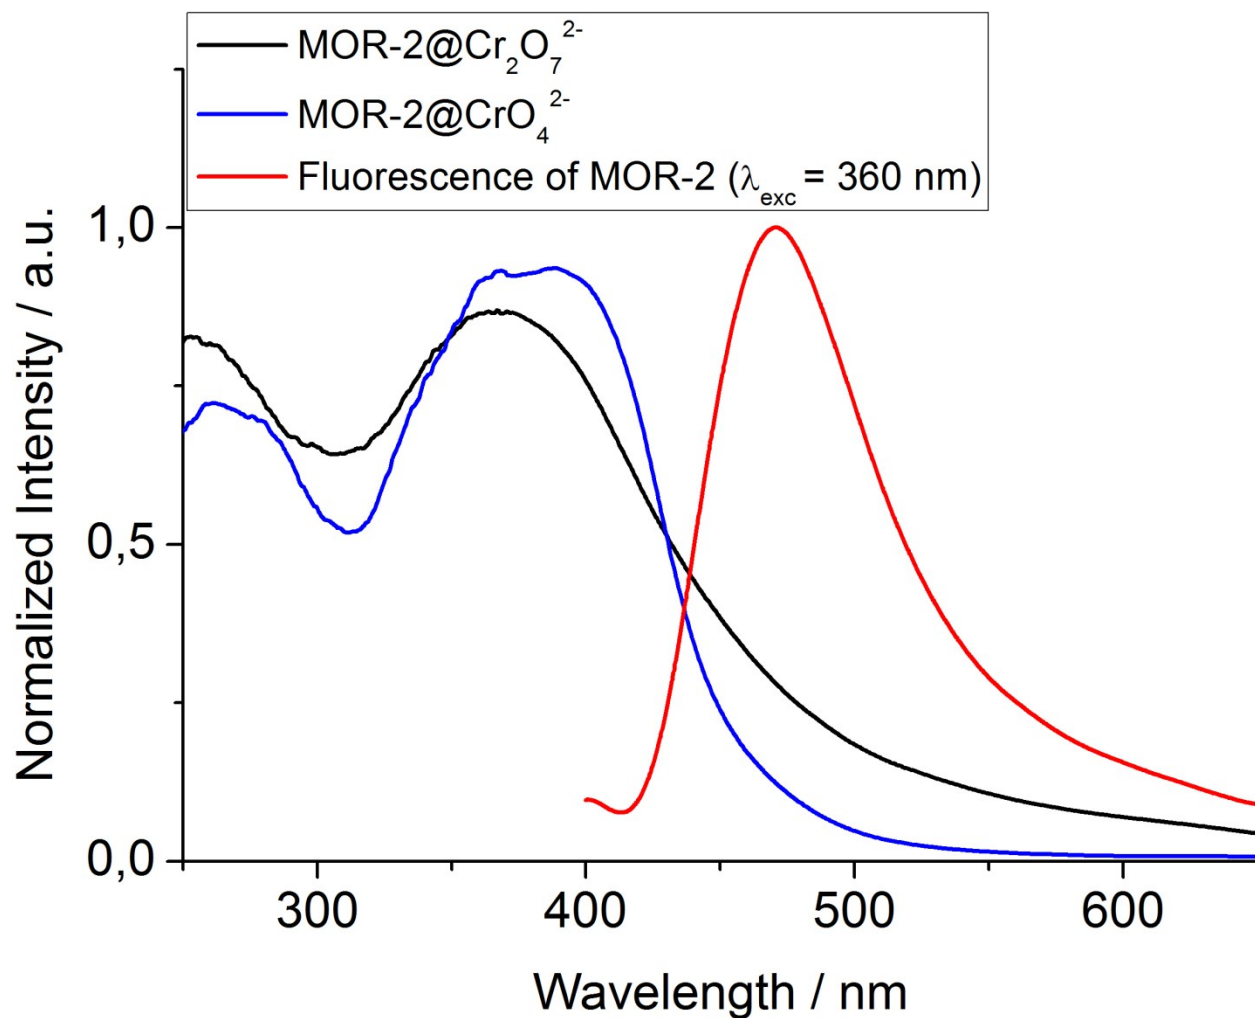

**Figure S35.** Diffuse reflectance profiles of **MOR-2@Cr<sub>2</sub>O<sub>7</sub><sup>2-</sup>** and **MOR-2@CrO<sub>4</sub><sup>2-</sup>** and fluorescence profile of **MOR-2**. The fluorescence spectrum shows considerable overlap with the low-energy oxido-Cr(VI) based features of the diffuse reflectance spectra.

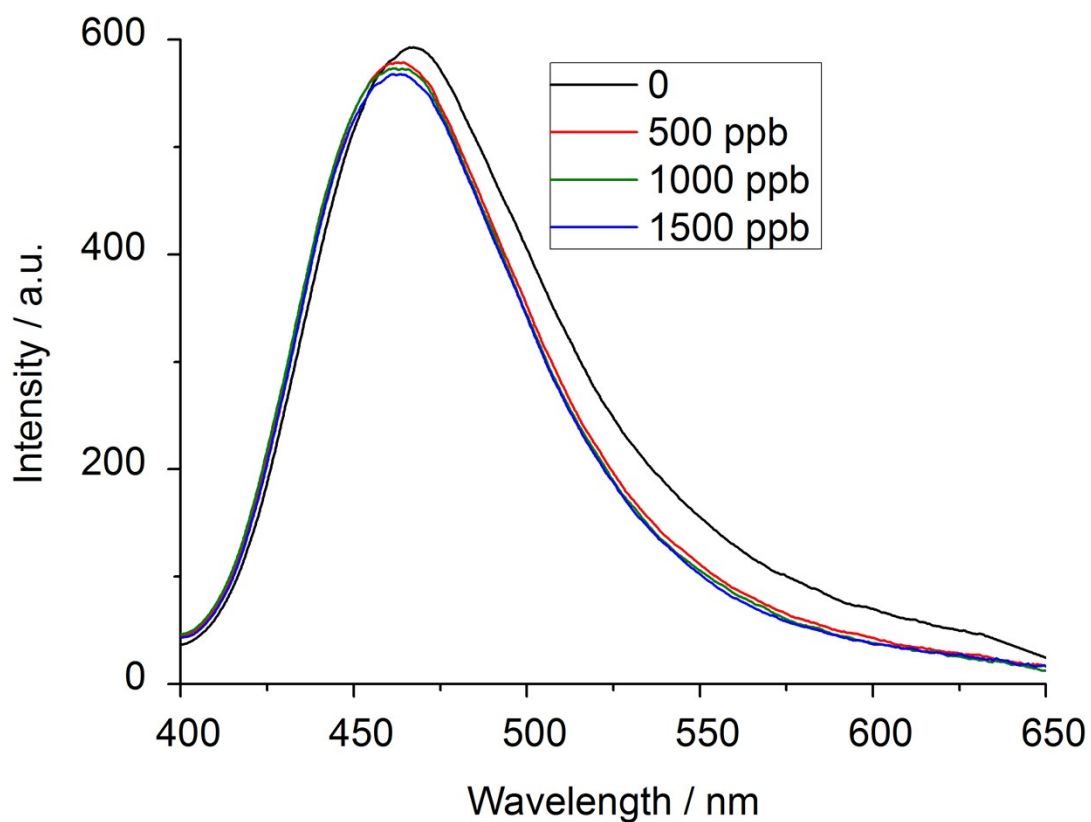

**Figure S36.** Emission spectra upon excitation at 360 nm of deactivated **MOR-2** suspended in water at pH 3 in the presence of different concentrations of Cr(IV). **MOR-2** was deactivated by treatment for 12 h in methanol with a 100-fold excess of triethylamine in order to deprotonate all the active groups.

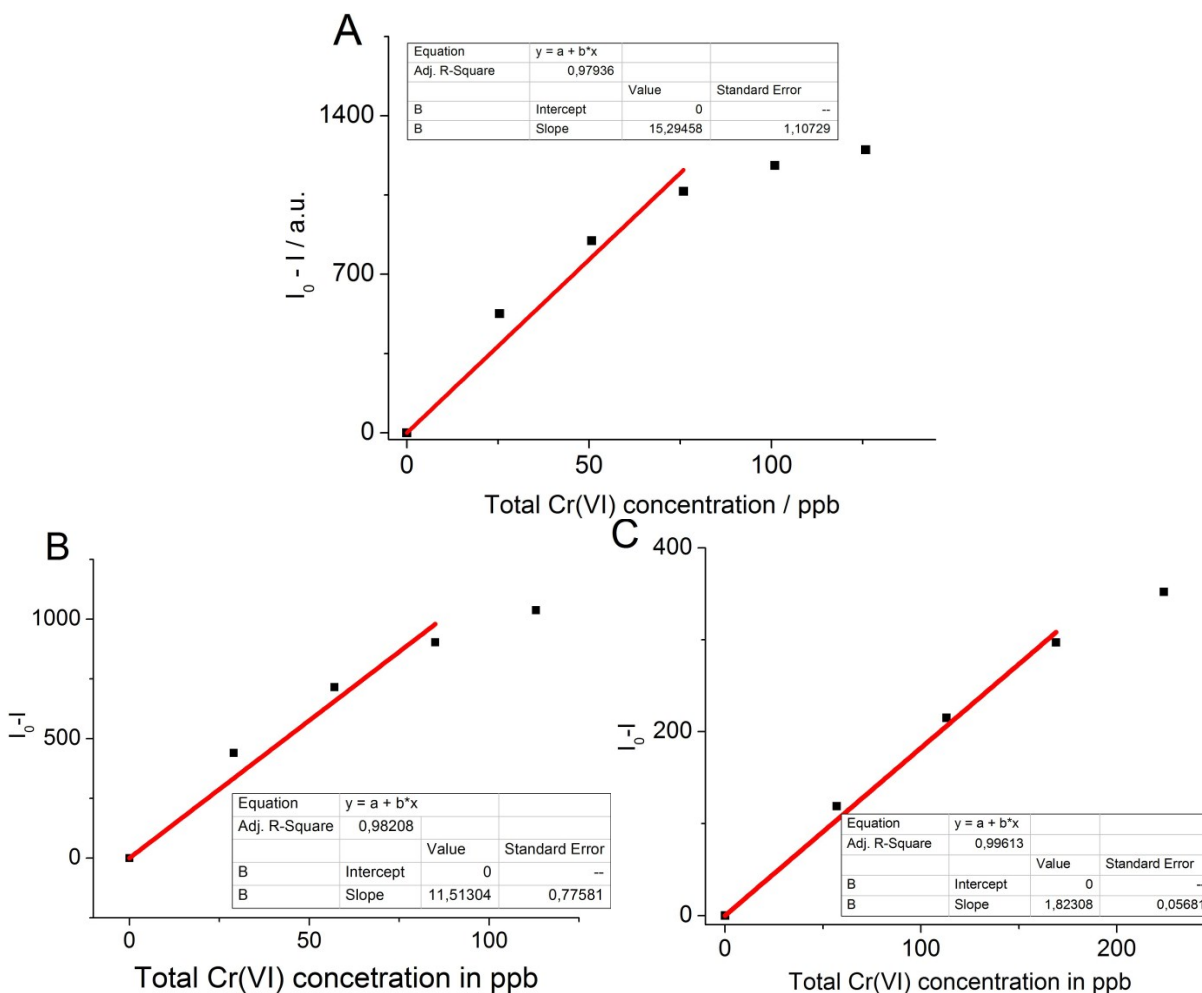

**Figure S37.** Linear fitting of the initial part of the calibration curves from the data of the fluorescence titrations. The slope of the linear fitting,  $S$ , in each case was used to determine the limit of detection, LOD, and limit of quantification, LOQ, by using the formulas  $LOD = \frac{3S}{SD}$  and  $LOQ = \frac{10S}{SD}$  where  $SD$  is the standard deviation of the measurement of the initial emission intensity  $I_0$ . A: Standard dichromate sample and doubly distilled water as solvent, B: Sample from industrial chromium waste and doubly distilled water as solvent and C: Sample from industrial chromium waste and potable water containing 10.5 ppm of competing  $\text{SO}_4^{2-}$  ions. See main text for more details.



## **References**

1. P. J. Chupas, X. Qiu, J. C. Hanson, P. L. Lee, C. P. Grey and S. J. L. Billinge, *J. Appl. Crystallogr.*, 2003, **36**, 1342.
2. A. P. Hammersley, S. O. Svensson, M. Manfland, A. N. Fitch, and D. Hausermann, *High Pressure Res.*, 1996, **14**, 235.
3. T. Egami and S. J. L. Billinge, *Underneath the Bragg peaks: structural analysis of complex materials* (Pergamon Press, Elsevier, Oxford, England, 2003).
4. X. Qiu, J. W. Thompson and S. J. L. Billinge, *J. Appl. Crystallogr.* **2004**, *37*, 678.
5. C. L. Farrow, P. Juhas, J. W. Liu, D. Bryndin, E. S. Bozin, J. Bloch, Th. Proffen and S. J. L. Billinge, *J. Phys.: Condens. Matter*, 2007, **19**, 335219.
6. W.W. Wendlandt and H.G. Hecht, *Reflectance Spectroscopy*, Wiley Interscience, New York, 1966.
7. Z. Marczenko and M. Balcerzak, *Separation, Preconcentration and Spectrophotometry in Inorganic Analysis*, 1st Edition, Elsevier, 2000, pg. 159.
8. A. D. Eaton, L. S. Clesceri, A. E. Greenberg, M. A. H. Franson, *Standard methods for the examination of water and wastewater*, American Public Health Association., 20<sup>th</sup> edition, Washington DC, 1998.
9. R. Soares et al., *Chem. Spec. Bioavailab.*, 2009, **21**, 153.
10. H. E. Taylor, *Inductively Coupled Plasma-Mass Spectroscopy, Practices and Techniques*, Academic Press, 2001.
11. (a) M. C. Biesinger, C. Brown, J. R. Mycroft, R. D. Davidson and N. S. McIntyre, *Surf. Interface Anal.*, 2004, **36**, 1550; (b) E. Desimoni, C. Malitesta, P. G. Zamboni and J. C. Riviere, *Surf. Interface Anal.*, 1988, **13**, 173.
12. A.D. Becke, *Phys. Rev. A*, 1988, **38**, 3098.

13. J. P. Perdew, *Phys. Rev. B*, 1986,**33**, 8822.
14. Frisch, M. J.; Trucks, G. W.; Schlegel, H. B.; Scuseria, G. E.; Robb, M. A.; Cheeseman, J. R.; Scalmani, G.; Barone, V.; Mennucci, B.; Petersson, G. A.; Nakatsuji, H.; Caricato, M.; Li, X.; Hratchian, H. P.; Izmaylov, A. F.; Bloino, J.; Zheng, G.; Sonnenberg, J. L.; Hada, M.; Ehara, M.; Toyota, K.; Fukuda, R.; Hasegawa, J.; Ishida, M.; Nakajima, T.; Honda, Y.; Kitao, O.; Nakai, H.; Vreven, T.; Montgomery, J. A., Jr.; Peralta, J. E.; Ogliaro, F.; Bearpark, M.; Heyd, J. J.; Brothers, E.; Kudin, K. N.; Staroverov, V. N.; Kobayashi, R.; Normand, J.; Raghavachari, K.; Rendell, A.; Burant, J. C.; Iyengar, S. S.; Tomasi, J.; Cossi, M.; Rega, N.; Millam, M. J.; Klene, M.; Knox, J. E.; Cross, J. B.; Bakken, V.; Adamo, C.; Jaramillo, J.; Gomperts, R.; Stratmann, R. E.; Yazyev, O.; Austin, A. J.; Cammi, R.; Pomelli, C.; Ochterski, J. W.; Martin, R. L.; Morokuma, K.; Zakrzewski, V. G.; Voth, G. A.; Salvador, P.; Dannenberg, J. J.; Dapprich, S.; Daniels, A. D.; Farkas, Ö.; Foresman, J. B.; Ortiz, J. V.; Cioslowski, J.; Fox, D. J., Gaussian 09, Revision **D.01**, Gaussian, Inc., Wallingford CT, 2009.
15. J.-D. Chai and M. Martin Head-Gordon, *Phys. Chem. Chem. Phys.*, 2008, **10**, 6615.
16. (a) D. Rappoport and F. Furche, *J. Chem. Phys.*, 2010, **133**, 134105. (b) EMSL basis set exchange, <https://bse.pnl.gov/bse/portal>, accessed 26-06-2015.

**Table S4.** Cartesian coordinates and energetic data.

| <b>[PhNH<sub>2</sub>CH<sub>2</sub>PyH]<sup>2+</sup></b> |              |              |              |
|---------------------------------------------------------|--------------|--------------|--------------|
| N                                                       | 0.468269000  | 0.039365000  | 0.637571000  |
| C                                                       | 1.932360000  | 0.021388000  | 0.348549000  |
| C                                                       | 2.585759000  | -1.215300000 | 0.300946000  |
| C                                                       | 3.957551000  | -1.227261000 | 0.004675000  |
| C                                                       | 4.639548000  | -0.023767000 | -0.237665000 |
| C                                                       | 3.956990000  | 1.202476000  | -0.183315000 |
| C                                                       | 2.585051000  | 1.236169000  | 0.110007000  |
| C                                                       | -0.391318000 | -0.012626000 | -0.634867000 |
| C                                                       | -1.869415000 | 0.044158000  | -0.336261000 |
| C                                                       | -2.561515000 | 1.237450000  | -0.121715000 |
| C                                                       | -3.900965000 | -1.193575000 | -0.022302000 |
| C                                                       | -3.938598000 | 1.207317000  | 0.158723000  |
| C                                                       | -4.614786000 | -0.019307000 | 0.210350000  |
| N                                                       | -2.572645000 | -1.126654000 | -0.280393000 |
| H                                                       | 0.230952000  | 0.887772000  | 1.181222000  |
| H                                                       | 0.236696000  | -0.756805000 | 1.255554000  |
| H                                                       | 2.049255000  | -2.149158000 | 0.495859000  |
| H                                                       | 4.489336000  | -2.181636000 | -0.032062000 |
| H                                                       | 5.708801000  | -0.041076000 | -0.466506000 |
| H                                                       | 4.488723000  | 2.140138000  | -0.365184000 |
| H                                                       | 2.049789000  | 2.189000000  | 0.157672000  |
| H                                                       | -0.100667000 | -0.927348000 | -1.169725000 |
| H                                                       | -0.093652000 | 0.856136000  | -1.237452000 |
| H                                                       | -2.024703000 | 2.186667000  | -0.181801000 |
| H                                                       | -4.343631000 | -2.189687000 | -0.016190000 |
| H                                                       | -4.478317000 | 2.142004000  | 0.328313000  |
| H                                                       | -5.683901000 | -0.076447000 | 0.419544000  |
| H                                                       | -2.082019000 | -2.011268000 | -0.452241000 |
| Sum of electronic and zero-point Energies=              |              |              | -574.656887  |
| Sum of electronic and thermal Energies=                 |              |              | -574.645005  |
| Sum of electronic and thermal Enthalpies=               |              |              | -574.644060  |
| Sum of electronic and thermal Free Energies=            |              |              | -574.696770  |

| [PhNH <sub>2</sub> CH <sub>2</sub> Py] <sup>+</sup> |              |              |              |
|-----------------------------------------------------|--------------|--------------|--------------|
| N                                                   | -0.425201000 | -0.691884000 | 0.787792000  |
| C                                                   | -1.751479000 | -0.218576000 | 0.345127000  |
| C                                                   | -1.842572000 | 1.039094000  | -0.266875000 |
| C                                                   | -3.101506000 | 1.486931000  | -0.695141000 |
| C                                                   | -4.239782000 | 0.684976000  | -0.508493000 |
| C                                                   | -4.124607000 | -0.571436000 | 0.107913000  |
| C                                                   | -2.871745000 | -1.035388000 | 0.539382000  |
| C                                                   | 0.478629000  | -1.276024000 | -0.286283000 |
| C                                                   | 1.823382000  | -0.562957000 | -0.168982000 |
| C                                                   | 2.950277000  | -0.935096000 | -0.915765000 |
| C                                                   | 2.959425000  | 1.186030000  | 0.858167000  |
| C                                                   | 4.123486000  | -0.186822000 | -0.747708000 |
| C                                                   | 4.131706000  | 0.892293000  | 0.152138000  |
| N                                                   | 1.826720000  | 0.469009000  | 0.696609000  |
| H                                                   | -0.529027000 | -1.362315000 | 1.563926000  |
| H                                                   | 0.201956000  | 0.115036000  | 1.148826000  |
| H                                                   | -0.951847000 | 1.659891000  | -0.402244000 |
| H                                                   | -3.189402000 | 2.468092000  | -1.170004000 |
| H                                                   | -5.218727000 | 1.041310000  | -0.841954000 |
| H                                                   | -5.009124000 | -1.197076000 | 0.256545000  |
| H                                                   | -2.774311000 | -2.014736000 | 1.017780000  |
| H                                                   | 0.008911000  | -1.085919000 | -1.263227000 |
| H                                                   | 0.563243000  | -2.362651000 | -0.144265000 |
| H                                                   | 2.908937000  | -1.782067000 | -1.606011000 |
| H                                                   | 2.913087000  | 2.012734000  | 1.574115000  |
| H                                                   | 5.023996000  | -0.444578000 | -1.312354000 |
| H                                                   | 5.030385000  | 1.494248000  | 0.307182000  |
| Sum of electronic and zero-point Energies=          |              |              | -574.243461  |
| Sum of electronic and thermal Energies=             |              |              | -574.231874  |
| Sum of electronic and thermal Enthalpies=           |              |              | -574.230930  |
| Sum of electronic and thermal Free Energies=        |              |              | -574.283161  |

| <b>[PhNHCH<sub>2</sub>PyH]<sup>+</sup></b>   |              |              |              |
|----------------------------------------------|--------------|--------------|--------------|
| N                                            | 0.524044000  | -1.349761000 | -0.040024000 |
| C                                            | 1.671214000  | -0.517396000 | 0.007879000  |
| C                                            | 1.627525000  | 0.776749000  | 0.571216000  |
| C                                            | 2.776873000  | 1.583469000  | 0.565406000  |
| C                                            | 3.975372000  | 1.125582000  | -0.003370000 |
| C                                            | 4.014489000  | -0.159860000 | -0.572041000 |
| C                                            | 2.877570000  | -0.977750000 | -0.566967000 |
| C                                            | -0.516336000 | -1.233736000 | 0.977880000  |
| C                                            | -1.730097000 | -0.478003000 | 0.455253000  |
| C                                            | -2.823493000 | -0.052860000 | 1.217269000  |
| C                                            | -2.744541000 | 0.398548000  | -1.532024000 |
| C                                            | -3.885546000 | 0.602818000  | 0.580676000  |
| C                                            | -3.849500000 | 0.831751000  | -0.808229000 |
| N                                            | -1.739617000 | -0.234479000 | -0.876500000 |
| H                                            | 0.746678000  | -2.317709000 | -0.273975000 |
| H                                            | 0.701456000  | 1.166000000  | 1.004779000  |
| H                                            | 2.725569000  | 2.582888000  | 1.009489000  |
| H                                            | 4.866635000  | 1.759941000  | -0.004759000 |
| H                                            | 4.940842000  | -0.536446000 | -1.017920000 |
| H                                            | 2.918943000  | -1.981530000 | -1.004689000 |
| H                                            | -0.151156000 | -0.739676000 | 1.896749000  |
| H                                            | -0.853596000 | -2.241389000 | 1.276287000  |
| H                                            | -2.833005000 | -0.237455000 | 2.293711000  |
| H                                            | -2.621185000 | 0.532181000  | -2.607142000 |
| H                                            | -4.744675000 | 0.939935000  | 1.166498000  |
| H                                            | -4.665188000 | 1.341852000  | -1.322827000 |
| H                                            | -0.883481000 | -0.574792000 | -1.358219000 |
| Sum of electronic and zero-point Energies=   |              |              | -574.252633  |
| Sum of electronic and thermal Energies=      |              |              | -574.240988  |
| Sum of electronic and thermal Enthalpies=    |              |              | -574.240043  |
| Sum of electronic and thermal Free Energies= |              |              | -574.291862  |

| [PhNHCH <sub>2</sub> Py]                     |              |              |              |
|----------------------------------------------|--------------|--------------|--------------|
| N                                            | 0.431486000  | 0.215747000  | -0.356168000 |
| C                                            | 1.798042000  | 0.118426000  | -0.150412000 |
| C                                            | 2.589588000  | 1.299403000  | -0.111841000 |
| C                                            | 3.975449000  | 1.225156000  | 0.058186000  |
| C                                            | 4.622018000  | -0.018762000 | 0.195646000  |
| C                                            | 3.846891000  | -1.188901000 | 0.158309000  |
| C                                            | 2.454376000  | -1.133019000 | -0.010802000 |
| C                                            | -0.477820000 | -0.884159000 | -0.104952000 |
| C                                            | -1.915420000 | -0.382511000 | -0.039397000 |
| C                                            | -2.991957000 | -1.290212000 | -0.025873000 |
| C                                            | -3.353866000 | 1.426235000  | 0.113870000  |
| C                                            | -4.295308000 | -0.788743000 | 0.068179000  |
| C                                            | -4.485207000 | 0.601713000  | 0.140216000  |
| N                                            | -2.089684000 | 0.954327000  | 0.027995000  |
| H                                            | -0.016950000 | 1.123796000  | -0.194103000 |
| H                                            | 2.098142000  | 2.273584000  | -0.217044000 |
| H                                            | 4.558703000  | 2.152299000  | 0.087056000  |
| H                                            | 5.706758000  | -0.071248000 | 0.329086000  |
| H                                            | 4.327949000  | -2.167817000 | 0.263569000  |
| H                                            | 1.876596000  | -2.061436000 | -0.042122000 |
| H                                            | -0.242969000 | -1.405675000 | 0.851244000  |
| H                                            | -0.402916000 | -1.658664000 | -0.895204000 |
| H                                            | -2.804862000 | -2.367028000 | -0.088269000 |
| H                                            | -3.456898000 | 2.517182000  | 0.162893000  |
| H                                            | -5.151232000 | -1.470515000 | 0.081695000  |
| H                                            | -5.485644000 | 1.037250000  | 0.211631000  |
| Sum of electronic and zero-point Energies=   |              |              | -573.811952  |
| Sum of electronic and thermal Energies=      |              |              | -573.800178  |
| Sum of electronic and thermal Enthalpies=    |              |              | -573.799234  |
| Sum of electronic and thermal Free Energies= |              |              | -573.851250  |

**[PhNH<sub>2</sub>CH<sub>2</sub>PyH(CrO<sub>4</sub><sup>2-</sup>)]**

|                                              |              |              |              |
|----------------------------------------------|--------------|--------------|--------------|
| O                                            | 1.692325000  | -3.426816000 | -0.486408000 |
| Cr                                           | 0.489194000  | -2.431179000 | -0.125166000 |
| O                                            | 0.847954000  | -1.448578000 | 1.168360000  |
| O                                            | 0.259721000  | -1.327329000 | -1.496800000 |
| O                                            | -0.857262000 | -3.257126000 | 0.179934000  |
| N                                            | -0.713404000 | 0.803944000  | 0.126882000  |
| C                                            | -2.137953000 | 0.932026000  | 0.102826000  |
| C                                            | -2.910581000 | -0.206715000 | 0.433527000  |
| C                                            | -4.308161000 | -0.150475000 | 0.382281000  |
| C                                            | -4.965626000 | 1.032952000  | -0.000334000 |
| C                                            | -4.200317000 | 2.160764000  | -0.328280000 |
| C                                            | -2.795925000 | 2.120870000  | -0.275902000 |
| C                                            | 0.075321000  | 2.037623000  | 0.127036000  |
| C                                            | 1.579177000  | 1.856375000  | 0.087993000  |
| C                                            | 2.406013000  | 2.924633000  | -0.295276000 |
| C                                            | 3.515552000  | 0.519710000  | 0.482275000  |
| C                                            | 3.797048000  | 2.777916000  | -0.281038000 |
| C                                            | 4.366021000  | 1.554296000  | 0.113618000  |
| N                                            | 2.167492000  | 0.692233000  | 0.465286000  |
| H                                            | -0.206581000 | -0.507772000 | -1.147093000 |
| H                                            | -0.429957000 | 0.157363000  | 0.879994000  |
| H                                            | -2.409276000 | -1.138478000 | 0.719756000  |
| H                                            | -4.887769000 | -1.041731000 | 0.644196000  |
| H                                            | -6.058305000 | 1.073178000  | -0.038634000 |
| H                                            | -4.692687000 | 3.093242000  | -0.622936000 |
| H                                            | -2.232881000 | 3.023218000  | -0.526393000 |
| H                                            | -0.158390000 | 2.681941000  | 1.003032000  |
| H                                            | -0.187949000 | 2.626935000  | -0.766773000 |
| H                                            | 1.945117000  | 3.865534000  | -0.604980000 |
| H                                            | 3.860439000  | -0.467456000 | 0.795133000  |
| H                                            | 4.435859000  | 3.611909000  | -0.583087000 |
| H                                            | 5.446506000  | 1.402976000  | 0.132316000  |
| H                                            | 1.591281000  | -0.186846000 | 0.761233000  |
| Sum of electronic and zero-point Energies=   |              |              | -1920.603266 |
| Sum of electronic and thermal Energies=      |              |              | -1920.584885 |
| Sum of electronic and thermal Enthalpies=    |              |              | -1920.583941 |
| Sum of electronic and thermal Free Energies= |              |              | -1920.651752 |

**[PhNH<sub>2</sub>(CrO<sub>4</sub><sup>2-</sup>)CH<sub>2</sub>PyH]**

|                                              |              |              |              |
|----------------------------------------------|--------------|--------------|--------------|
| O                                            | -2.445152000 | 2.694324000  | -0.272005000 |
| Cr                                           | -0.841584000 | 2.585050000  | -0.181760000 |
| O                                            | -0.213113000 | 3.883932000  | 0.538422000  |
| O                                            | -0.426869000 | 1.102326000  | 0.832504000  |
| O                                            | -0.199802000 | 2.384159000  | -1.647966000 |
| N                                            | 0.805726000  | -0.858140000 | -0.283113000 |
| C                                            | 2.271714000  | -0.795863000 | -0.137332000 |
| C                                            | 2.802637000  | -0.025496000 | 0.907007000  |
| C                                            | 4.196339000  | 0.028161000  | 1.064611000  |
| C                                            | 5.035115000  | -0.678706000 | 0.187219000  |
| C                                            | 4.483708000  | -1.443470000 | -0.854302000 |
| C                                            | 3.091651000  | -1.510196000 | -1.021868000 |
| C                                            | 0.171094000  | -2.000476000 | 0.497847000  |
| C                                            | -1.329104000 | -2.086492000 | 0.283099000  |
| C                                            | -1.914501000 | -3.263300000 | -0.209763000 |
| C                                            | -3.408487000 | -1.058649000 | 0.472683000  |
| C                                            | -3.310141000 | -3.322159000 | -0.345660000 |
| C                                            | -4.073382000 | -2.200444000 | 0.002413000  |
| N                                            | -2.069030000 | -0.999721000 | 0.620693000  |
| H                                            | 0.557158000  | -0.953520000 | -1.279477000 |
| H                                            | 0.339960000  | 0.096320000  | 0.103317000  |
| H                                            | 2.135713000  | 0.528081000  | 1.574570000  |
| H                                            | 4.623935000  | 0.629016000  | 1.872365000  |
| H                                            | 6.120814000  | -0.631055000 | 0.312925000  |
| H                                            | 5.135362000  | -1.990979000 | -1.541213000 |
| H                                            | 2.655358000  | -2.105533000 | -1.830649000 |
| H                                            | 0.406608000  | -1.808618000 | 1.556778000  |
| H                                            | 0.664762000  | -2.933780000 | 0.192726000  |
| H                                            | -1.287128000 | -4.117805000 | -0.477744000 |
| H                                            | -3.961166000 | -0.154004000 | 0.745101000  |
| H                                            | -3.789508000 | -4.229995000 | -0.722647000 |
| H                                            | -5.162181000 | -2.200467000 | -0.090720000 |
| H                                            | -1.218905000 | 0.460781000  | 0.900500000  |
| Sum of electronic and zero-point Energies=   |              |              | -1920.600674 |
| Sum of electronic and thermal Energies=      |              |              | -1920.582174 |
| Sum of electronic and thermal Enthalpies=    |              |              | -1920.581229 |
| Sum of electronic and thermal Free Energies= |              |              | -1920.651674 |

**[PhNH<sub>2</sub>CH<sub>2</sub>Py(HOCrO<sub>3</sub><sup>-</sup>)]**

|                                              |              |              |              |
|----------------------------------------------|--------------|--------------|--------------|
| O                                            | 0.908628000  | 3.893650000  | 0.237996000  |
| Cr                                           | 1.484085000  | 2.396023000  | 0.088105000  |
| O                                            | 1.112900000  | 1.504357000  | 1.378767000  |
| O                                            | 0.645252000  | 1.533347000  | -1.321015000 |
| O                                            | 3.070589000  | 2.419881000  | -0.170582000 |
| H                                            | 1.166902000  | 1.571788000  | -2.146050000 |
| N                                            | -0.148108000 | -0.784443000 | -0.294851000 |
| C                                            | 0.959086000  | -1.724683000 | -0.066980000 |
| C                                            | 0.846096000  | -2.686918000 | 0.947583000  |
| C                                            | 1.903270000  | -3.587643000 | 1.147471000  |
| C                                            | 3.051808000  | -3.522258000 | 0.340506000  |
| C                                            | 3.148666000  | -2.550778000 | -0.668635000 |
| C                                            | 2.097925000  | -1.643387000 | -0.879329000 |
| C                                            | -1.325837000 | -1.329717000 | -1.066712000 |
| C                                            | -2.599174000 | -0.725557000 | -0.487182000 |
| C                                            | -3.822864000 | -0.769167000 | -1.174237000 |
| C                                            | -3.558392000 | 0.334685000  | 1.338018000  |
| C                                            | -4.953775000 | -0.232513000 | -0.544131000 |
| C                                            | -4.823151000 | 0.329720000  | 0.736126000  |
| N                                            | -2.464367000 | -0.184998000 | 0.740780000  |
| H                                            | 0.211126000  | 0.118375000  | -0.779747000 |
| H                                            | -0.581810000 | -0.453303000 | 0.609274000  |
| H                                            | -0.049469000 | -2.730458000 | 1.575362000  |
| H                                            | 1.827477000  | -4.339130000 | 1.938662000  |
| H                                            | 3.872902000  | -4.227081000 | 0.501310000  |
| H                                            | 4.042953000  | -2.493557000 | -1.295843000 |
| H                                            | 2.167177000  | -0.877027000 | -1.656260000 |
| H                                            | -1.331772000 | -2.426094000 | -0.952437000 |
| H                                            | -1.199437000 | -1.094826000 | -2.133791000 |
| H                                            | -3.885872000 | -1.210460000 | -2.173115000 |
| H                                            | -3.405986000 | 0.768813000  | 2.332151000  |
| H                                            | -5.924248000 | -0.247884000 | -1.048691000 |
| H                                            | -5.681542000 | 0.761797000  | 1.256830000  |
| Sum of electronic and zero-point Energies=   |              |              | -1920.597299 |
| Sum of electronic and thermal Energies=      |              |              | -1920.578270 |
| Sum of electronic and thermal Enthalpies=    |              |              | -1920.577325 |
| Sum of electronic and thermal Free Energies= |              |              | -1920.649632 |

**[PhNH<sub>2</sub>CH<sub>2</sub>PyH(HOCrO<sub>3</sub><sup>-</sup>)]**

|                                              |              |              |              |
|----------------------------------------------|--------------|--------------|--------------|
| O                                            | -1.386096000 | 3.588393000  | 0.278172000  |
| Cr                                           | -0.128695000 | 2.624296000  | 0.034427000  |
| O                                            | 0.296952000  | 1.859076000  | 1.392770000  |
| O                                            | -0.599139000 | 1.215104000  | -1.126387000 |
| O                                            | 1.098508000  | 3.443767000  | -0.590014000 |
| H                                            | -0.697038000 | 1.490626000  | -2.060513000 |
| N                                            | 0.545054000  | -1.153071000 | -0.550439000 |
| C                                            | 2.002658000  | -1.265450000 | -0.286128000 |
| C                                            | 2.630598000  | -0.288560000 | 0.497933000  |
| C                                            | 4.008727000  | -0.414627000 | 0.734144000  |
| C                                            | 4.729505000  | -1.492270000 | 0.193480000  |
| C                                            | 4.075391000  | -2.457419000 | -0.588859000 |
| C                                            | 2.697133000  | -2.351701000 | -0.832496000 |
| C                                            | -0.323597000 | -1.345328000 | 0.692406000  |
| C                                            | -1.787443000 | -1.535436000 | 0.365754000  |
| C                                            | -2.505666000 | -2.665813000 | 0.763512000  |
| C                                            | -3.763355000 | -0.605772000 | -0.603184000 |
| C                                            | -3.878690000 | -2.752623000 | 0.478171000  |
| C                                            | -4.516599000 | -1.711860000 | -0.211395000 |
| N                                            | -2.445597000 | -0.544592000 | -0.303207000 |
| H                                            | 0.284501000  | -1.854264000 | -1.263131000 |
| H                                            | 0.290110000  | -0.187349000 | -0.948194000 |
| H                                            | 2.059749000  | 0.548999000  | 0.916053000  |
| H                                            | 4.517750000  | 0.338319000  | 1.342495000  |
| H                                            | 5.803489000  | -1.579825000 | 0.381629000  |
| H                                            | 4.632634000  | -3.297165000 | -1.013029000 |
| H                                            | 2.181503000  | -3.100149000 | -1.442480000 |
| H                                            | -0.171152000 | -0.442463000 | 1.309138000  |
| H                                            | 0.054893000  | -2.224305000 | 1.229205000  |
| H                                            | -1.991181000 | -3.469011000 | 1.294652000  |
| H                                            | -4.172750000 | 0.243218000  | -1.152363000 |
| H                                            | -4.443414000 | -3.634587000 | 0.790376000  |
| H                                            | -5.580321000 | -1.750863000 | -0.451100000 |
| H                                            | -1.870071000 | 0.289800000  | -0.639815000 |
| Sum of electronic and zero-point Energies=   |              |              | -1921.029545 |
| Sum of electronic and thermal Energies=      |              |              | -1921.011024 |
| Sum of electronic and thermal Enthalpies=    |              |              | -1921.010080 |
| Sum of electronic and thermal Free Energies= |              |              | -1921.077750 |

**[PhNH<sub>2</sub>CH<sub>2</sub>PyH(Cr<sub>2</sub>O<sub>7</sub><sup>2-</sup>)]**

|                                              |              |              |              |
|----------------------------------------------|--------------|--------------|--------------|
| N                                            | 0.678852000  | -0.854221000 | -0.270298000 |
| C                                            | 1.763880000  | -1.671725000 | 0.293207000  |
| C                                            | 2.251030000  | -2.765659000 | -0.437705000 |
| C                                            | 3.281223000  | -3.542009000 | 0.113950000  |
| C                                            | 3.808574000  | -3.225722000 | 1.377564000  |
| C                                            | 3.303349000  | -2.132007000 | 2.098318000  |
| C                                            | 2.273914000  | -1.345096000 | 1.557672000  |
| C                                            | 1.049615000  | 0.032187000  | -1.440175000 |
| C                                            | 2.042115000  | 1.123270000  | -1.103700000 |
| C                                            | 3.242747000  | 1.296584000  | -1.797439000 |
| C                                            | 2.509653000  | 3.051289000  | 0.217869000  |
| C                                            | 4.079986000  | 2.377777000  | -1.476340000 |
| C                                            | 3.710525000  | 3.267830000  | -0.457789000 |
| N                                            | 1.716485000  | 2.009643000  | -0.120663000 |
| H                                            | 0.245894000  | -0.222416000 | 0.472958000  |
| H                                            | -0.174933000 | -1.454402000 | -0.625289000 |
| H                                            | 1.829728000  | -3.015446000 | -1.416172000 |
| H                                            | 3.667040000  | -4.399159000 | -0.445196000 |
| H                                            | 4.611034000  | -3.836059000 | 1.802132000  |
| H                                            | 3.706846000  | -1.886363000 | 3.084765000  |
| H                                            | 1.867949000  | -0.494945000 | 2.114473000  |
| H                                            | 0.101121000  | 0.467672000  | -1.796882000 |
| H                                            | 1.457386000  | -0.603336000 | -2.237455000 |
| H                                            | 3.513145000  | 0.590560000  | -2.585217000 |
| H                                            | 2.150946000  | 3.686481000  | 1.029454000  |
| H                                            | 5.018408000  | 2.519011000  | -2.018576000 |
| H                                            | 4.339742000  | 4.115675000  | -0.181980000 |
| H                                            | 0.792384000  | 1.824749000  | 0.439620000  |
| O                                            | -4.048067000 | -1.375916000 | -1.765935000 |
| O                                            | -3.288680000 | -1.828526000 | 0.707794000  |
| O                                            | -1.480422000 | -1.897200000 | -1.260950000 |
| Cr                                           | -2.864164000 | -1.191415000 | -0.699977000 |
| O                                            | -2.545059000 | 0.566963000  | -0.505927000 |
| O                                            | -2.113211000 | 3.073159000  | 0.448488000  |
| O                                            | -0.364047000 | 1.165773000  | 1.170685000  |
| O                                            | -2.861570000 | 1.245450000  | 2.157988000  |
| Cr                                           | -1.976890000 | 1.534002000  | 0.858742000  |
| Sum of electronic and zero-point Energies=   |              |              | -3190.988670 |
| Sum of electronic and thermal Energies=      |              |              | -3190.965701 |
| Sum of electronic and thermal Enthalpies=    |              |              | -3190.964757 |
| Sum of electronic and thermal Free Energies= |              |              | -3191.044597 |
